# Supplementary material
Source: publisher figshare collection journal article supplement (https://acs.figshare.com/ndownloader/files/4567558)

## Supporting Information

### Synthesis and Structural Characterization of Monophosphine- Cyclopalladated Ferrocenylpyrimidine Complexes and Reusable Catalytic System for Amination of Hindered Aryl Chlorides in PEG-400

Chen Xu\*, Zhi-Qiang Wang, Wei-Jun Fu, Xin-Hua Lou, Ying-Fei Li, Fei-Fei Cen,  
Hong-Ji Ma, Bao-Ming Ji\*

*College of Chemistry and Chemical Engineering, Luoyang Normal University,  
Luoyang, Henan 471022, China*

\*To whom correspondence should be addressed. E-mail address: xubohan@163.com,  
lyhxxjbm@126.com.

## Contents

$^1\text{H}$  NMR, and  $^{13}\text{C}\{^1\text{H}\}$  NMR spectra of compounds **1** and **3-6**

$^1\text{H}$  NMR, and  $^{13}\text{C}\{^1\text{H}\}$  NMR spectra of the coupled products

Compound **1**:  $^1\text{H}$  NMR

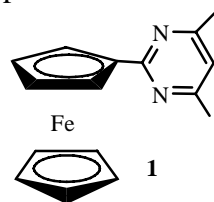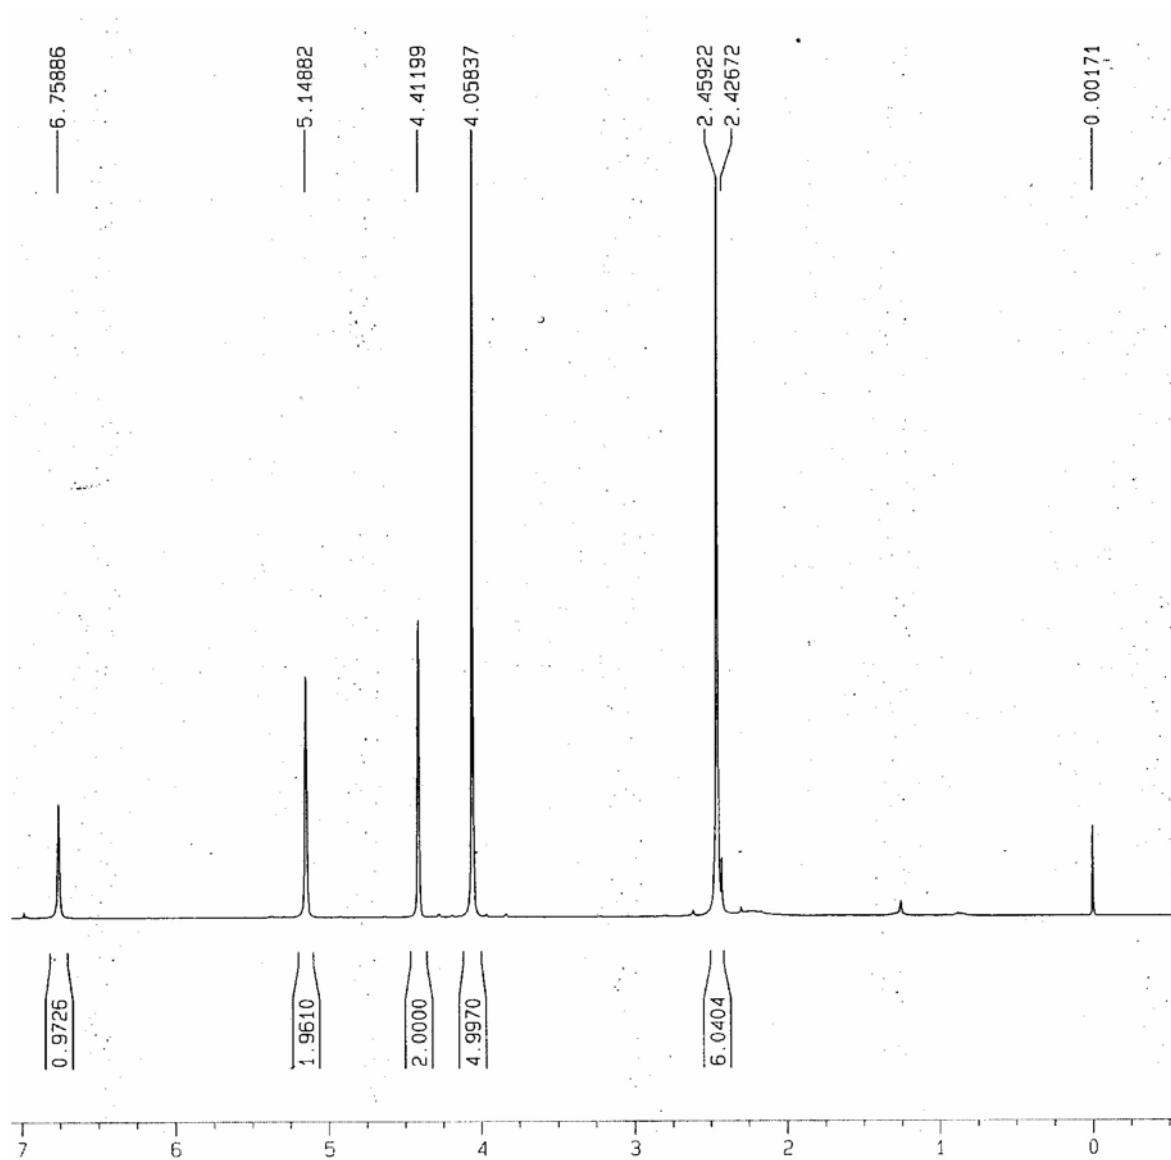

Compound **1**:  $^{13}\text{C}\{^1\text{H}\}$  NMR

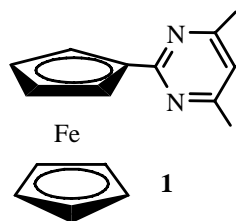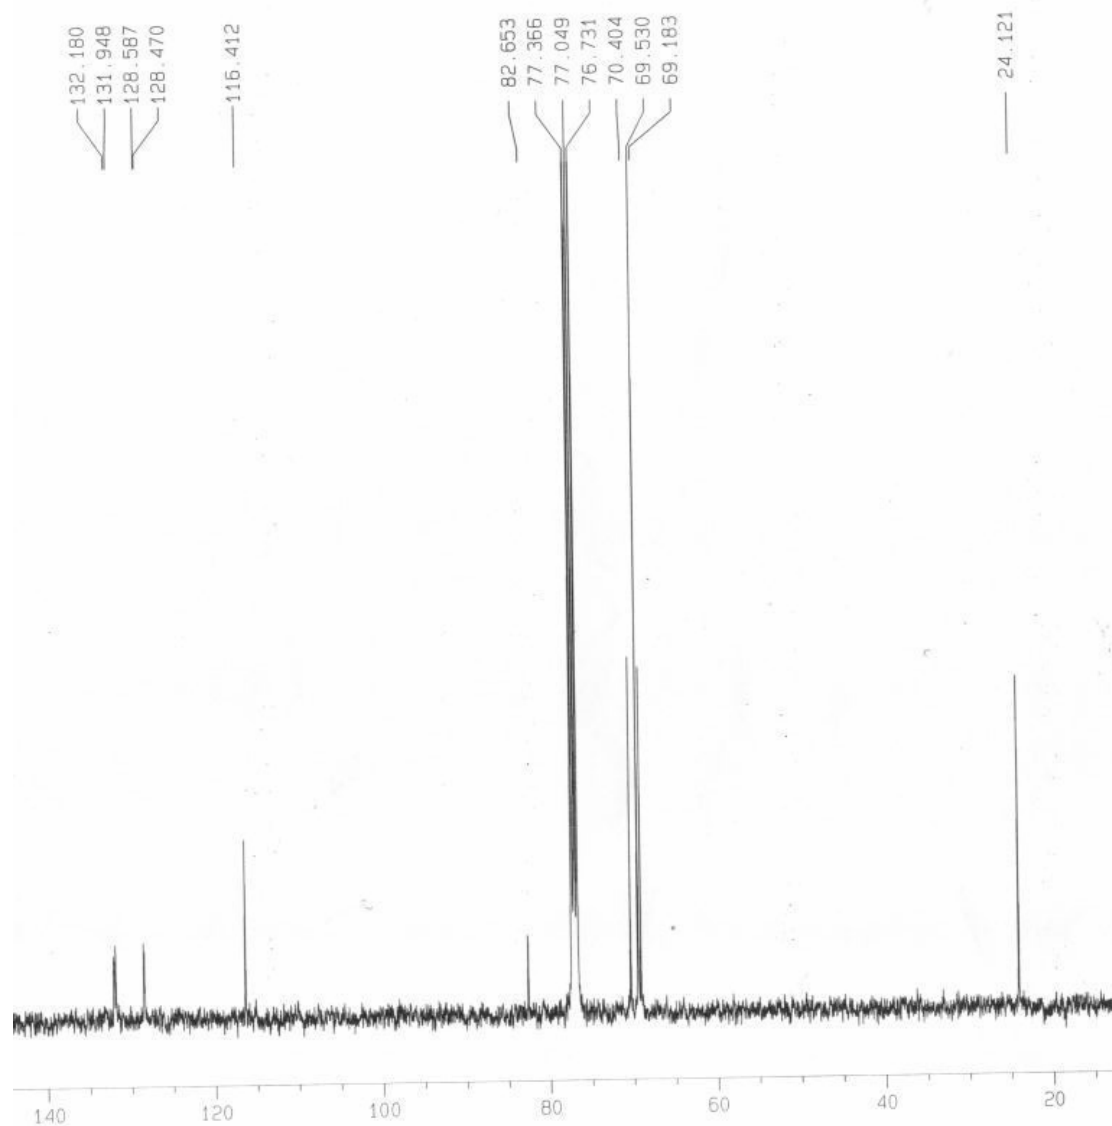

Compound 3:  $^1\text{H}$  NMR

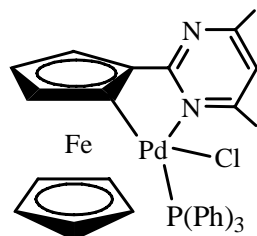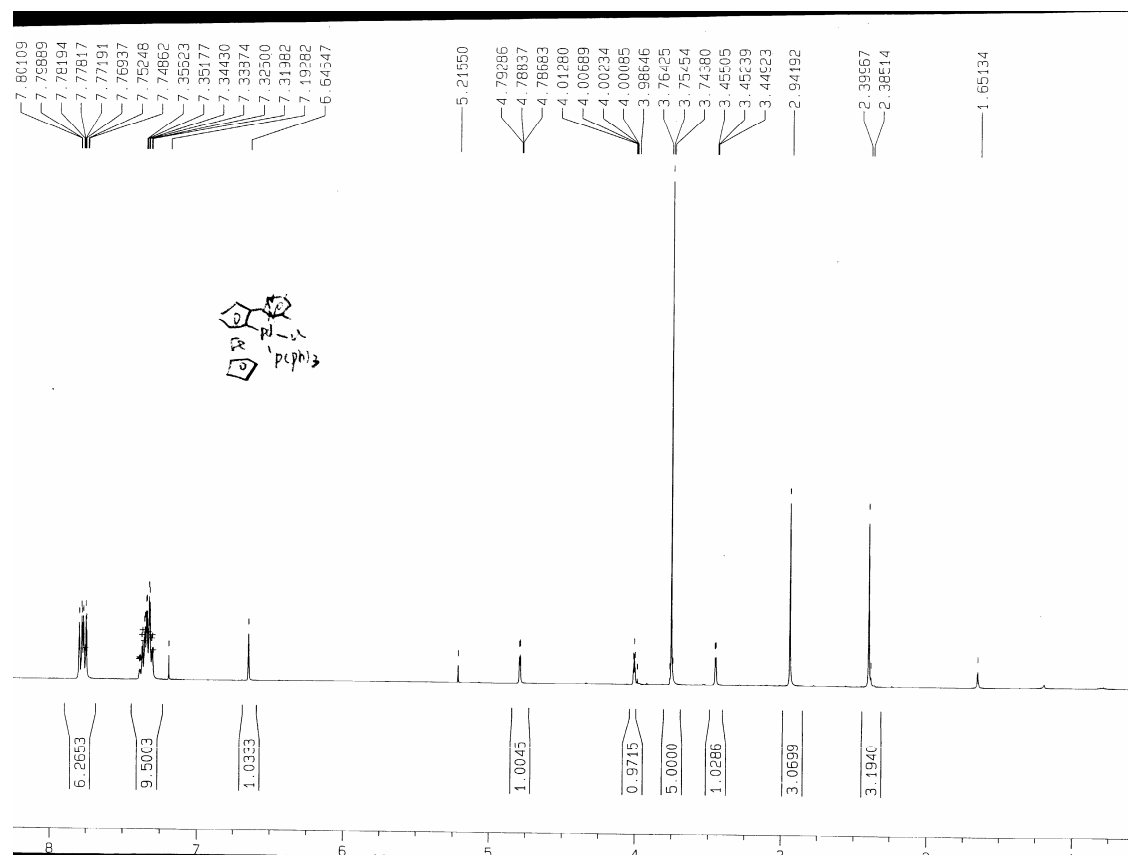

Compound **3**:  $^{13}\text{C}\{^1\text{H}\}$  NMR

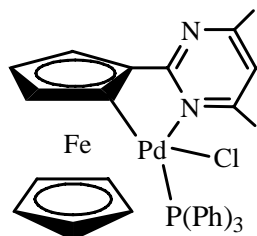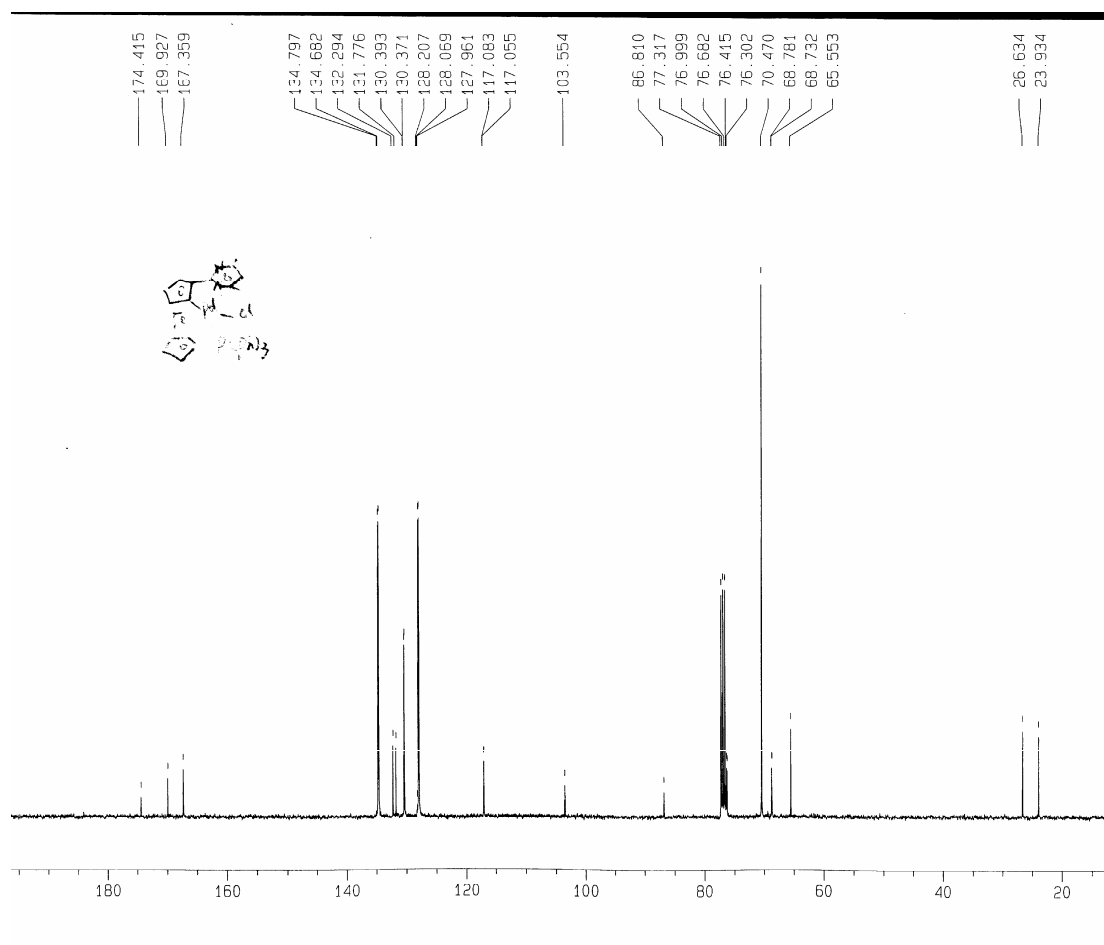

Compound **4**:  $^1\text{H}$  NMR

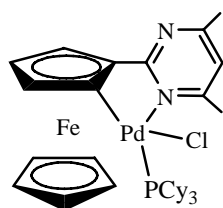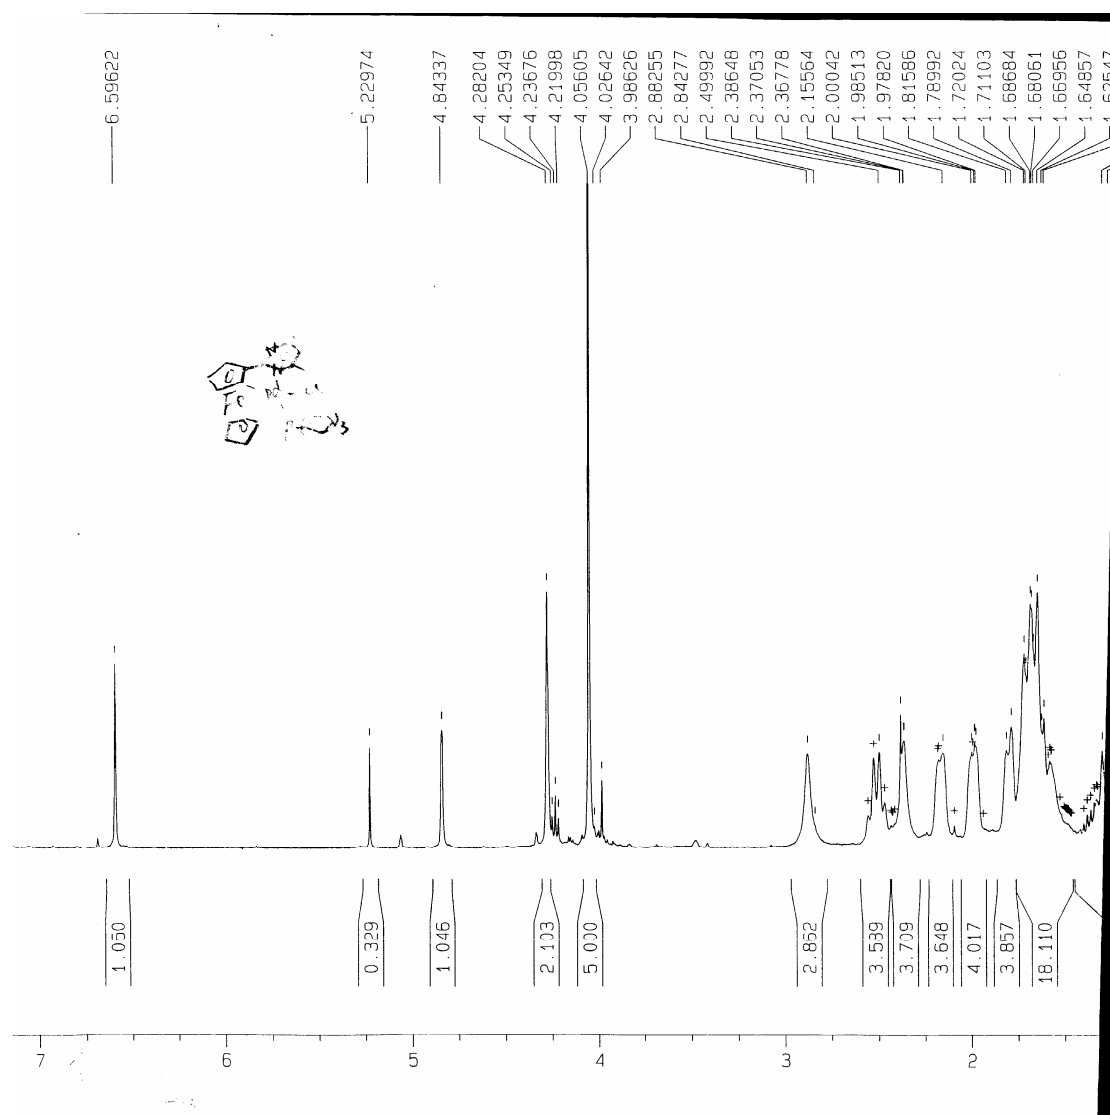

Compound 4:  $^{13}\text{C}\{^1\text{H}\}$  NMR

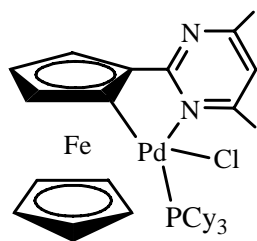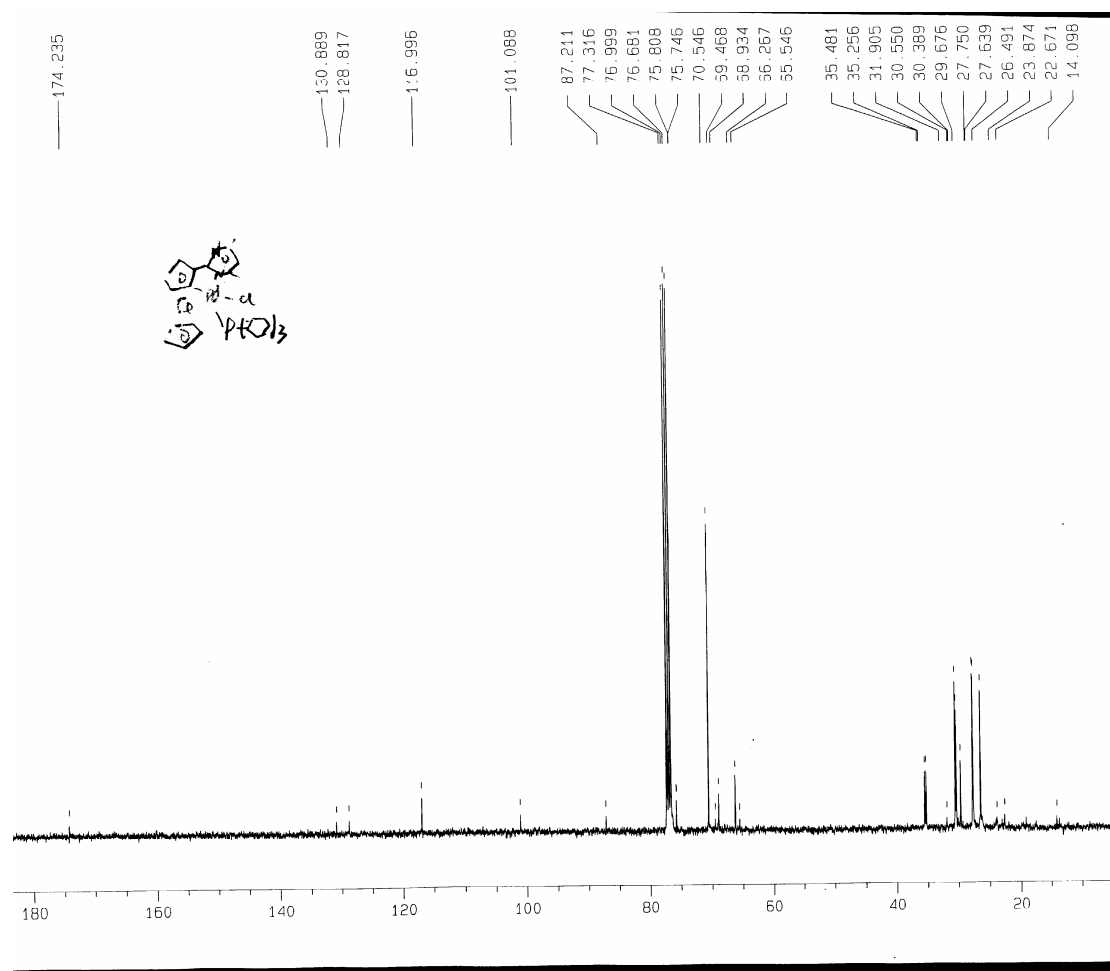

Compound 5:  $^1\text{H}$  NMR

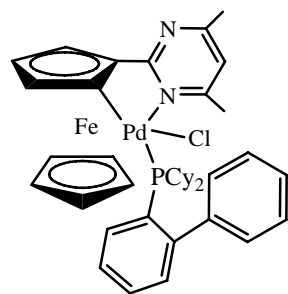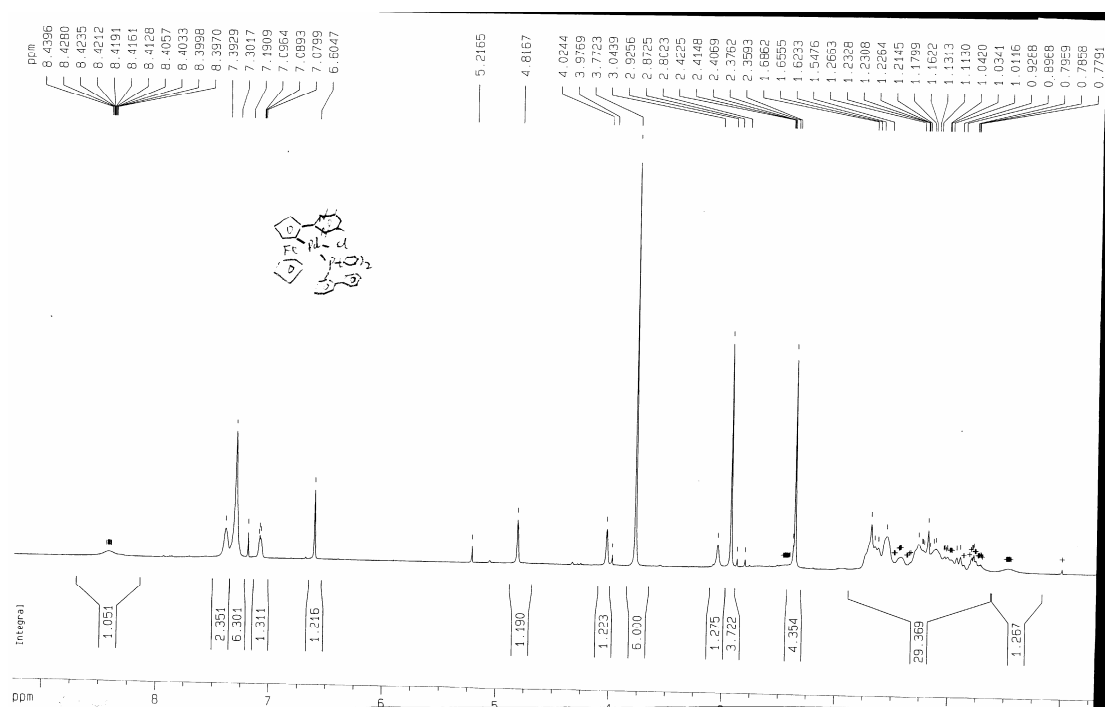



Compound **5**:  $^{13}\text{C}\{^1\text{H}\}$  NMR

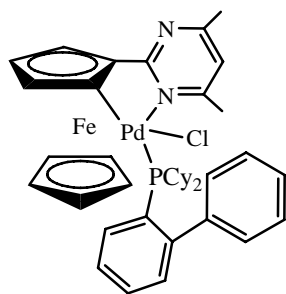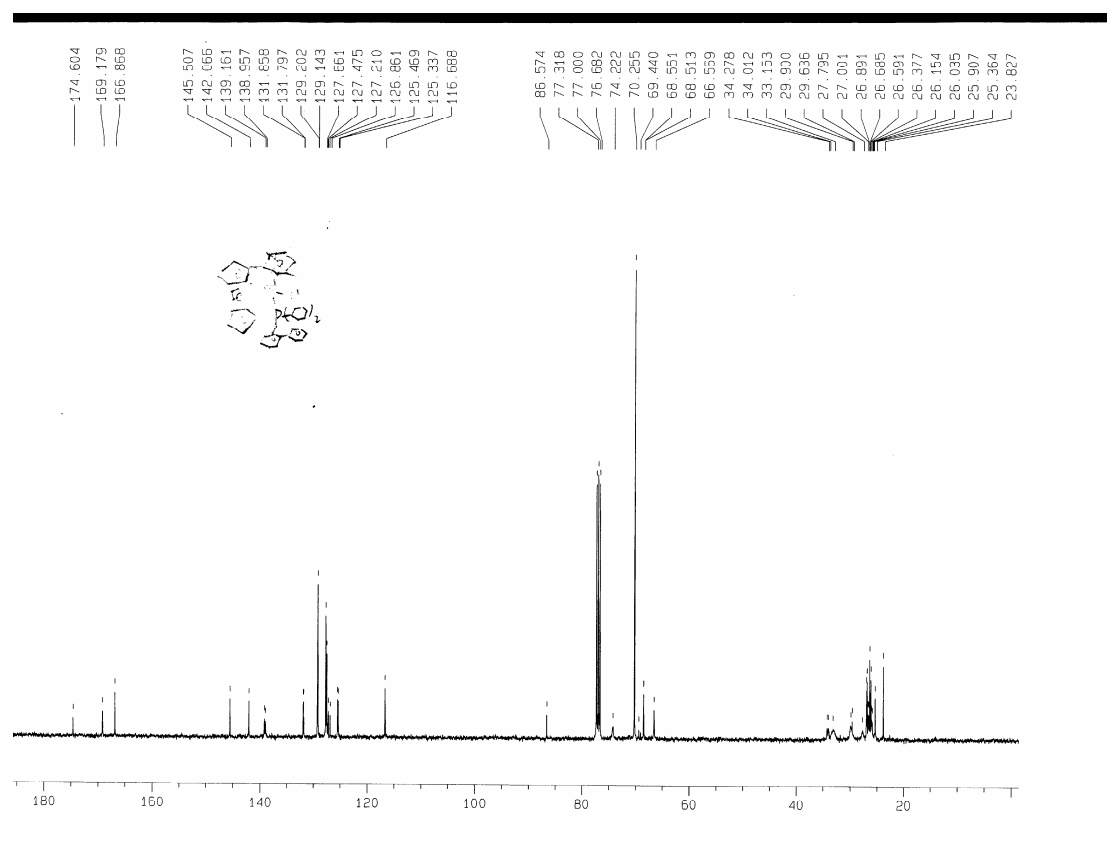

Compound **6**:  $^1\text{H}$  NMR

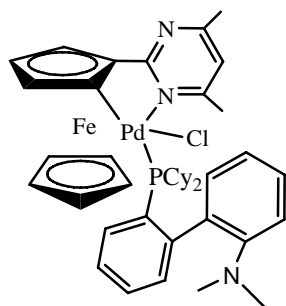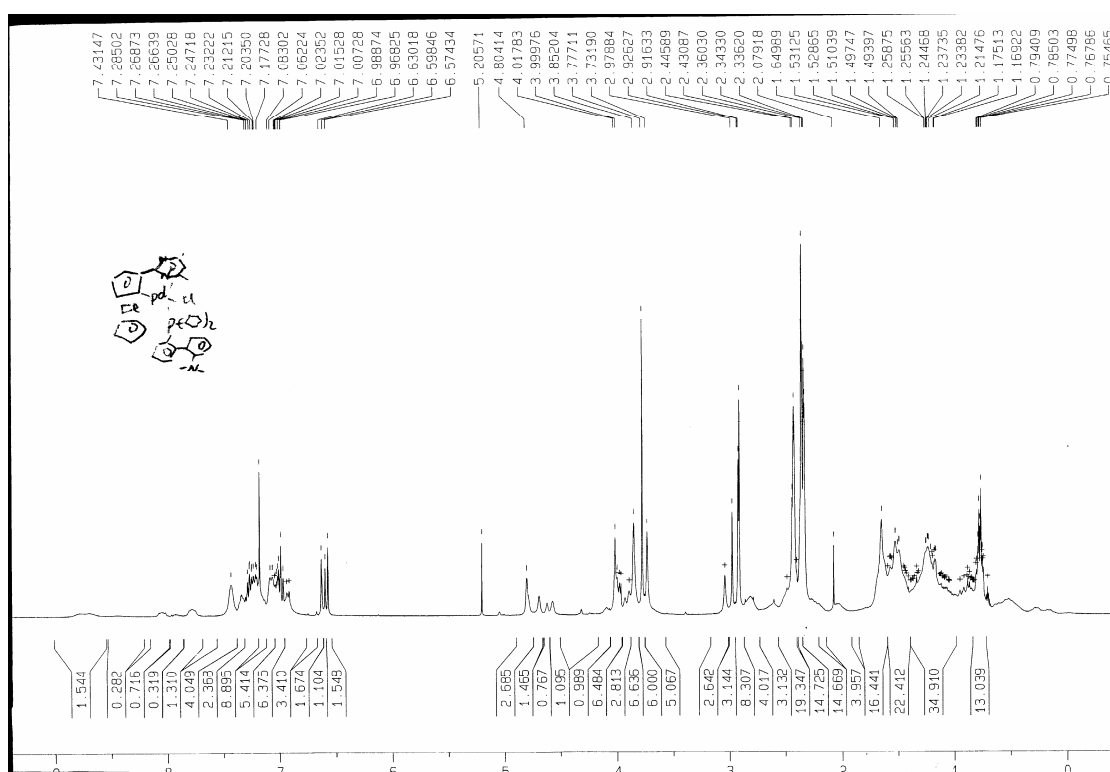

Compound **6**:  $^{13}\text{C}\{^1\text{H}\}$  NMR

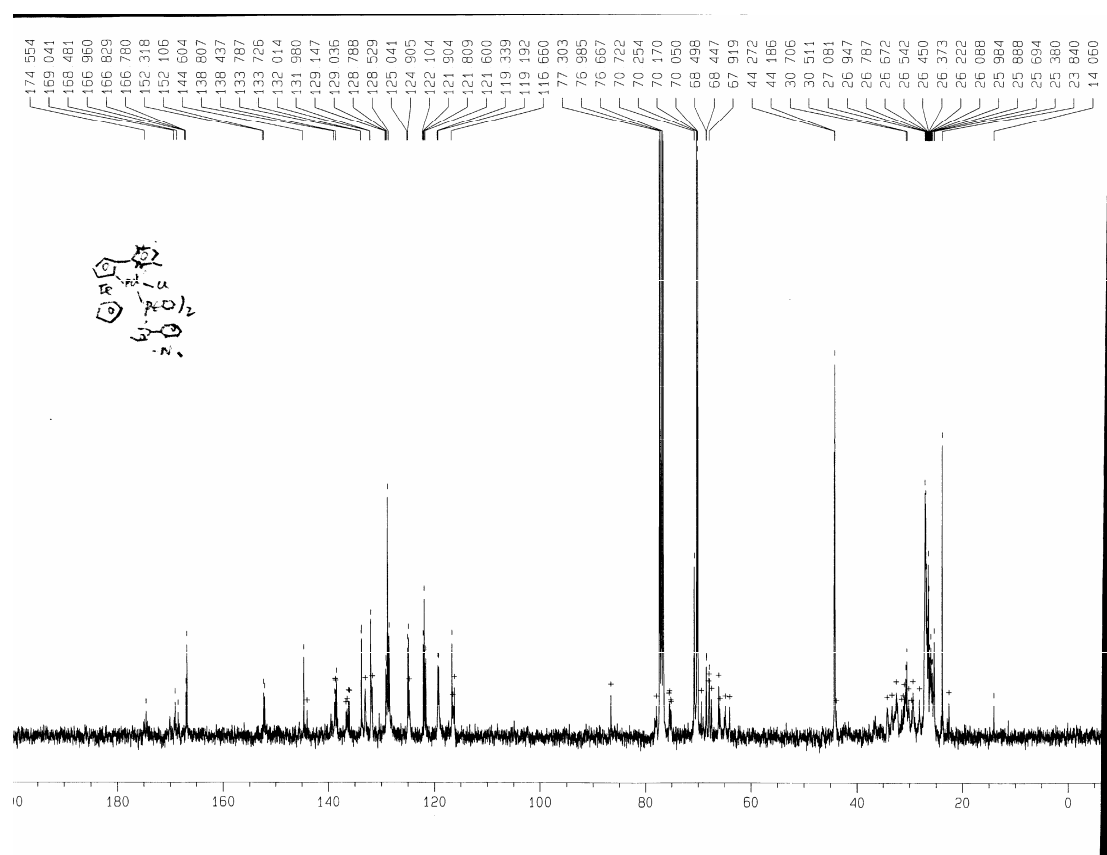

coupled product

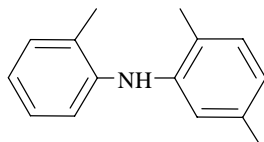

$^1\text{H}$  NMR

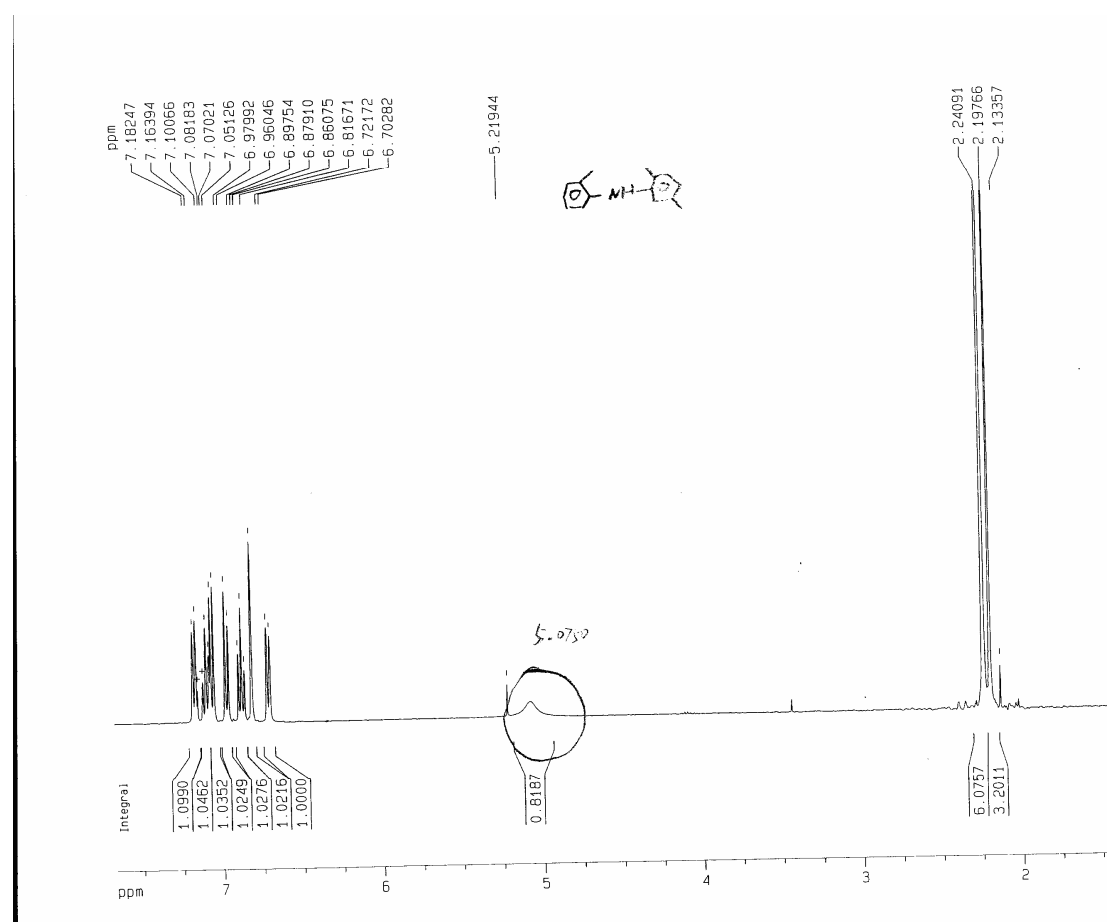

coupled product

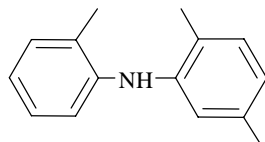

$^{13}\text{C}\{^1\text{H}\}$  NMR

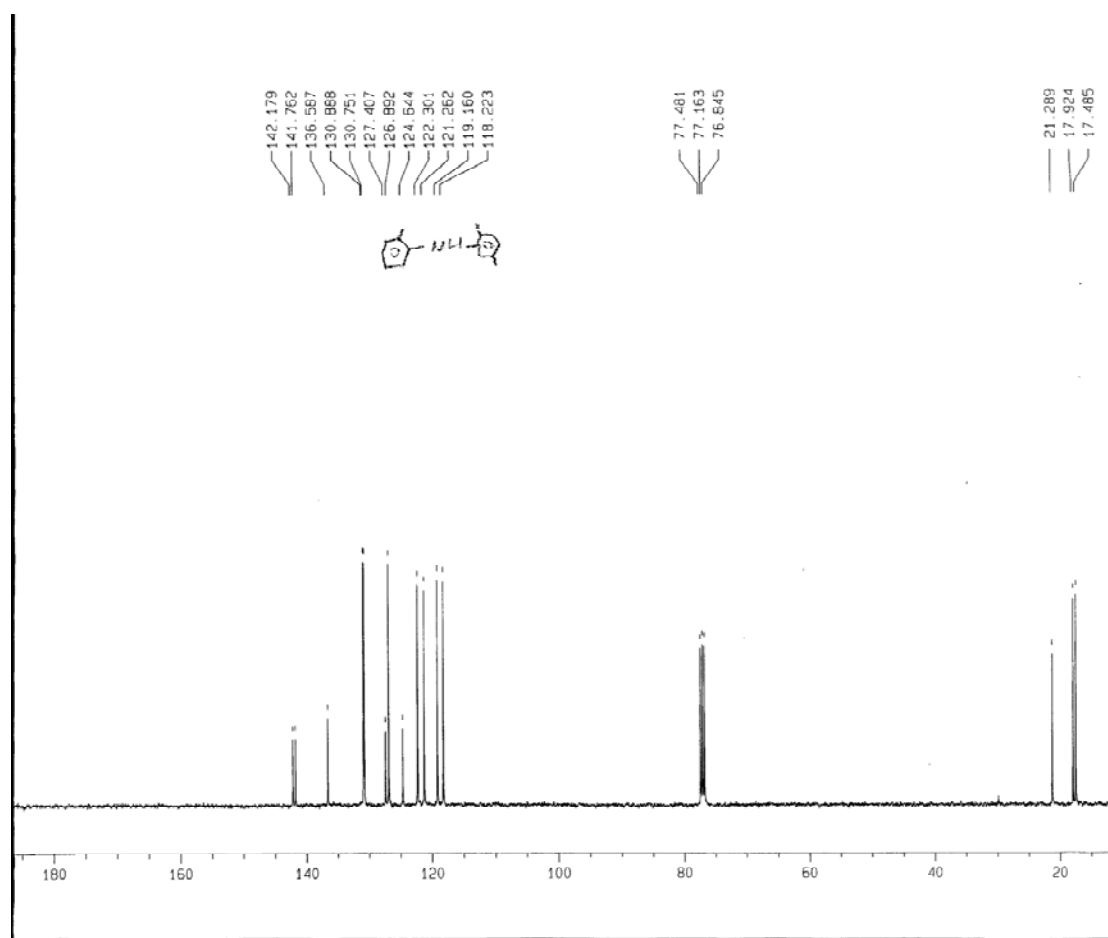

coupled product

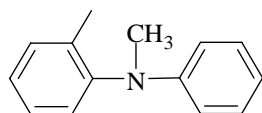

$^1\text{H}$  NMR

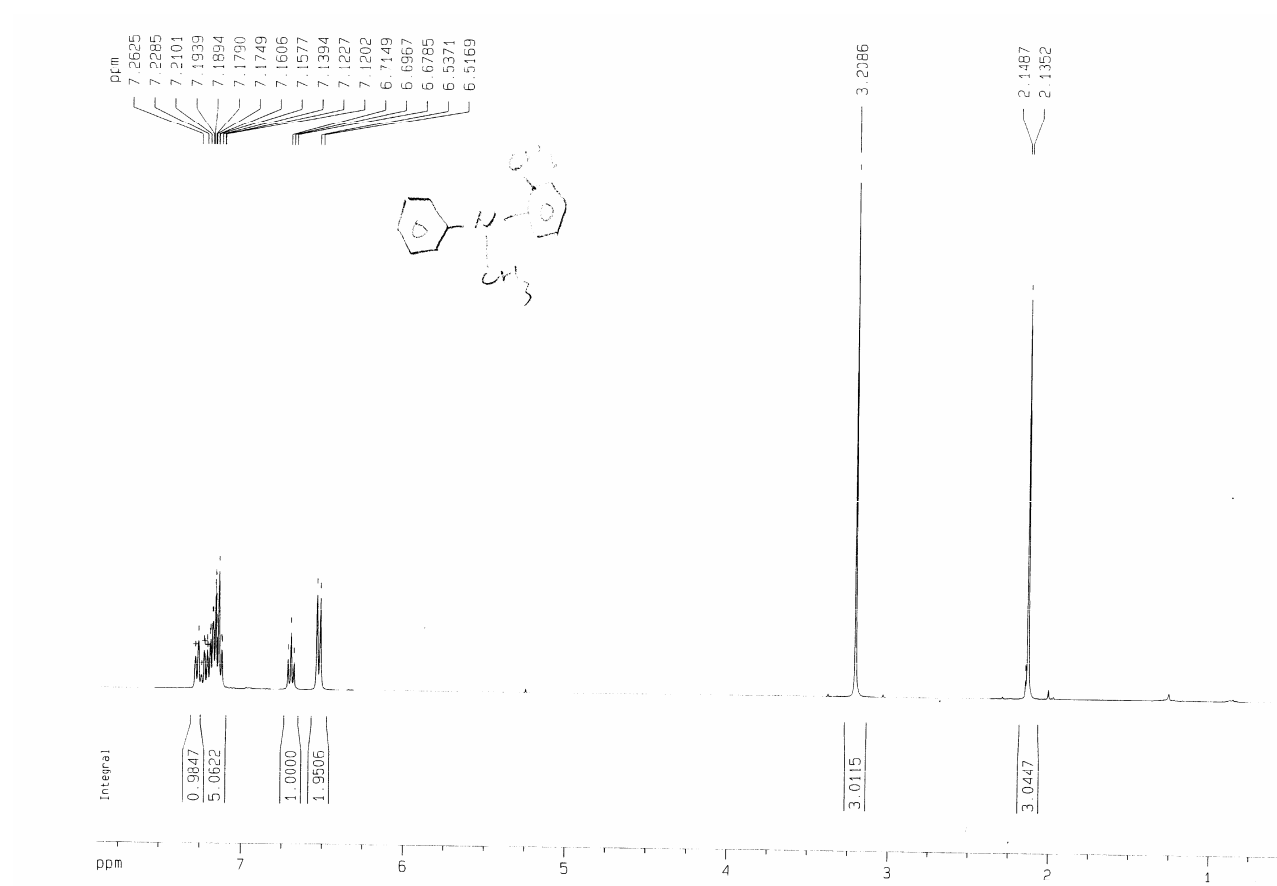

coupled product

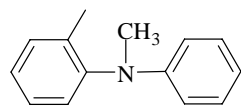

$^{13}\text{C}\{^1\text{H}\}$  NMR

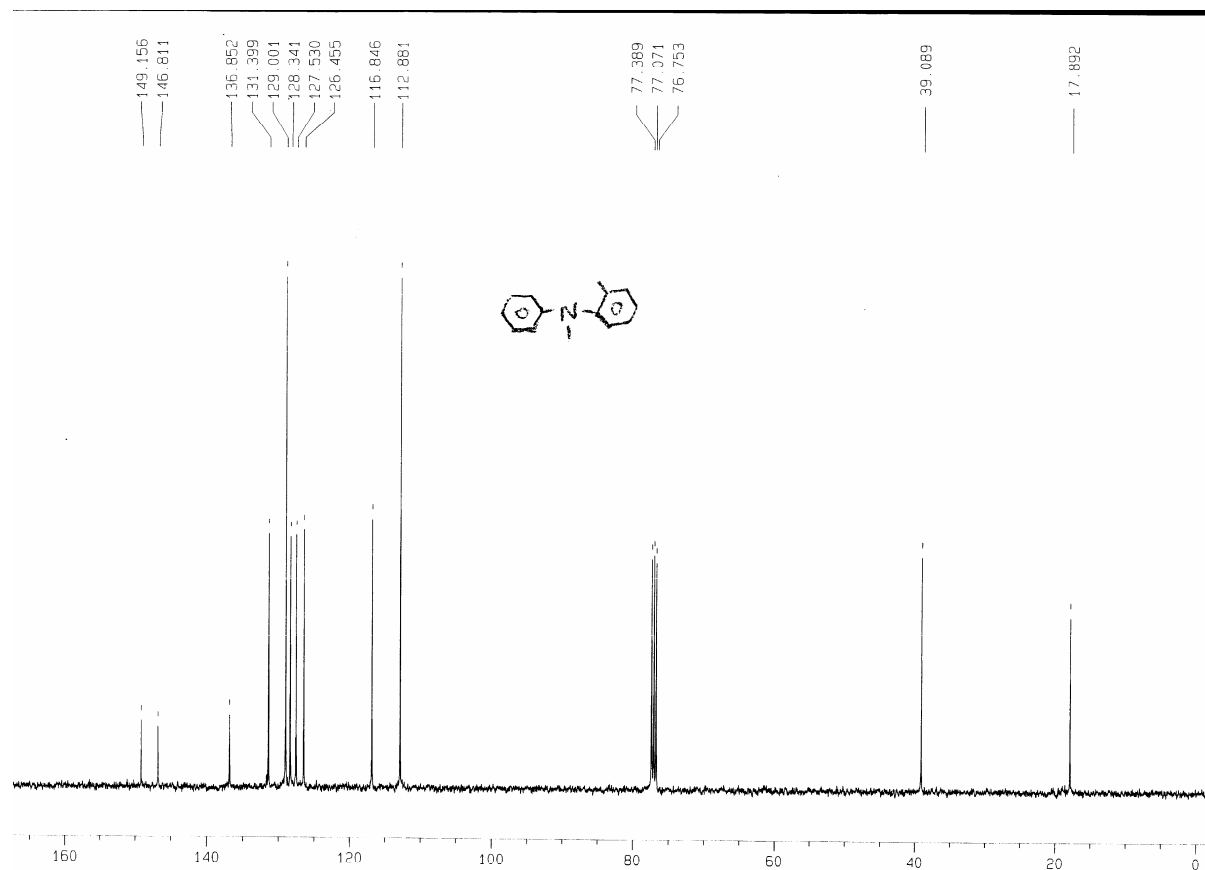

coupled product

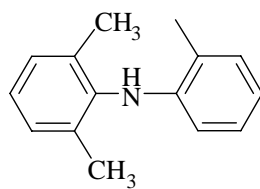

$^1\text{H}$  NMR

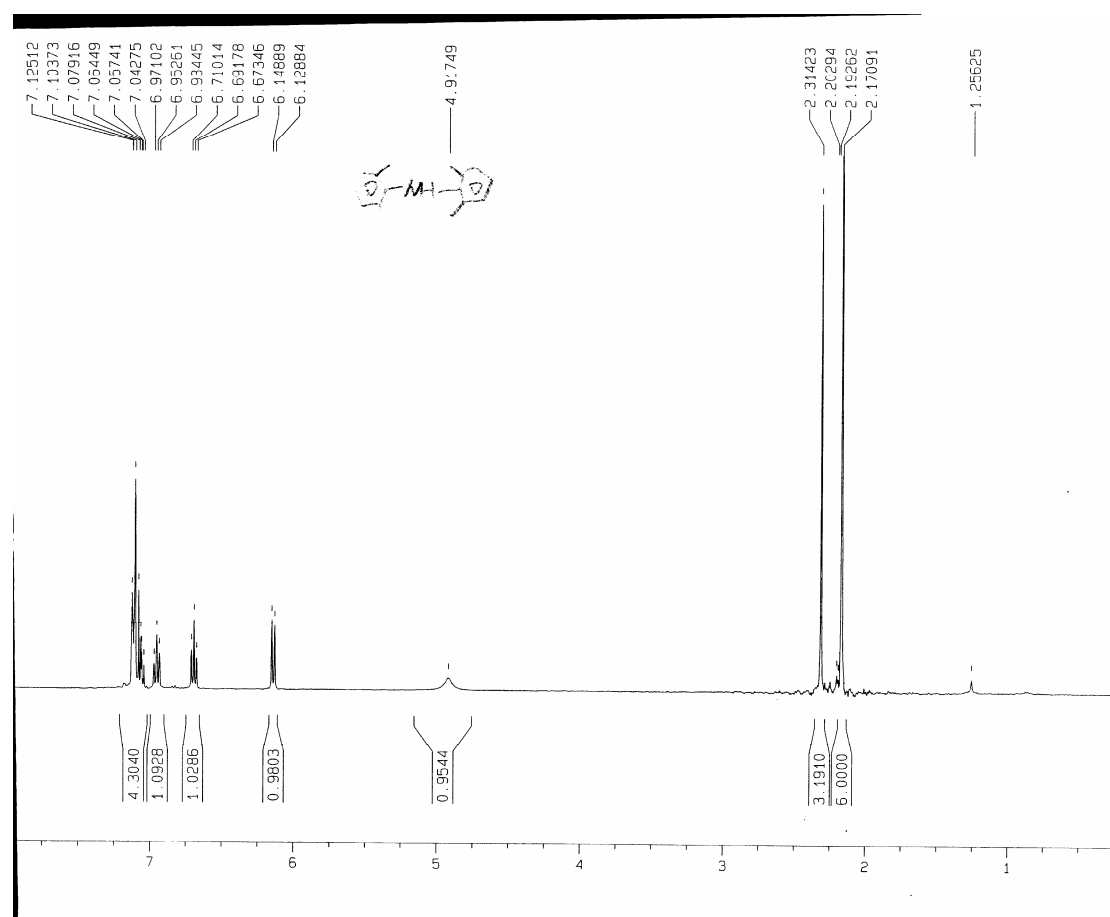



coupled product

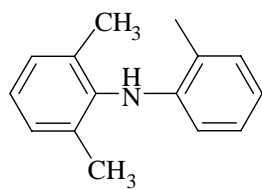

$^{13}\text{C}\{^1\text{H}\}$  NMR

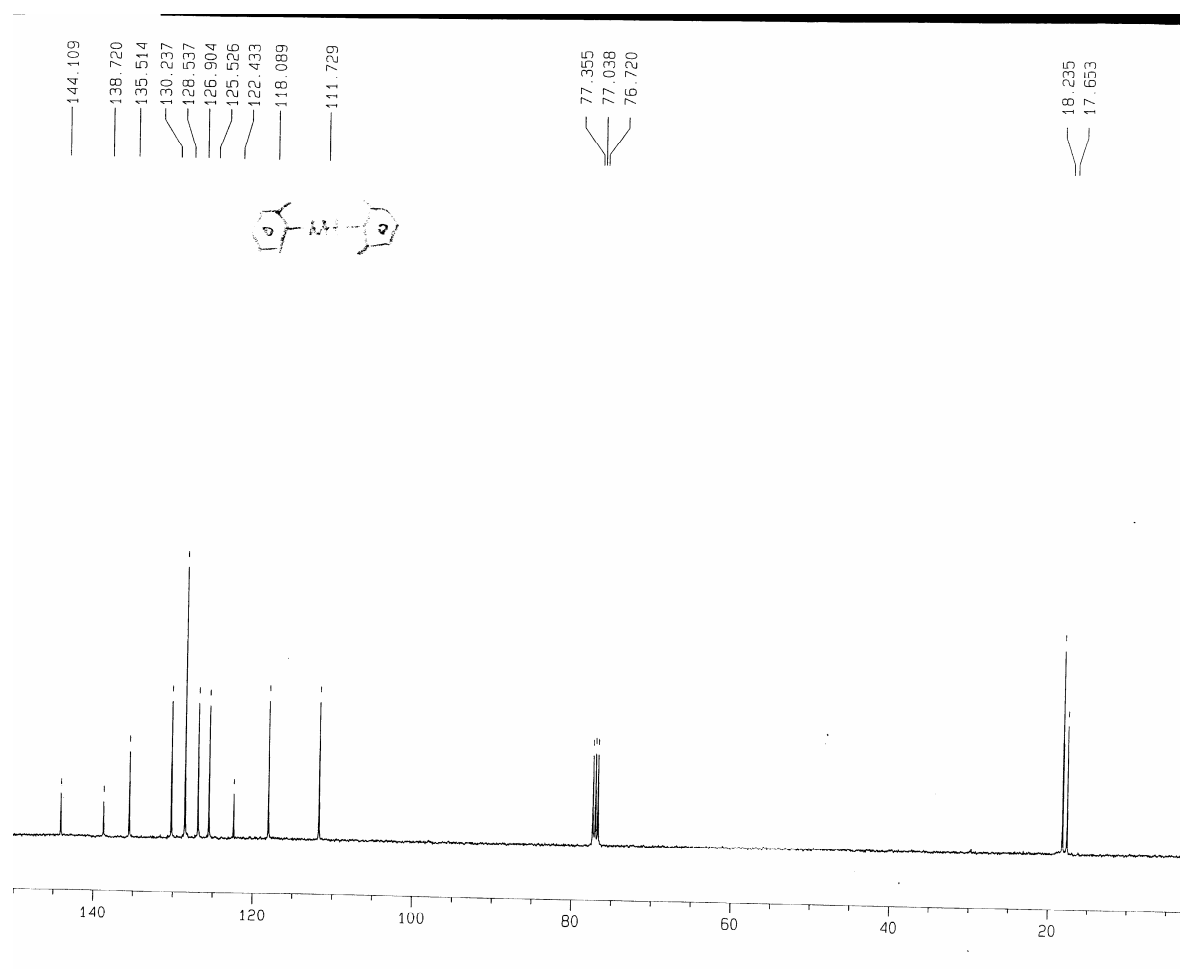

coupled product

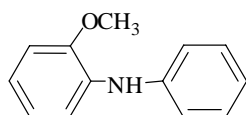

$^1\text{H}$  NMR

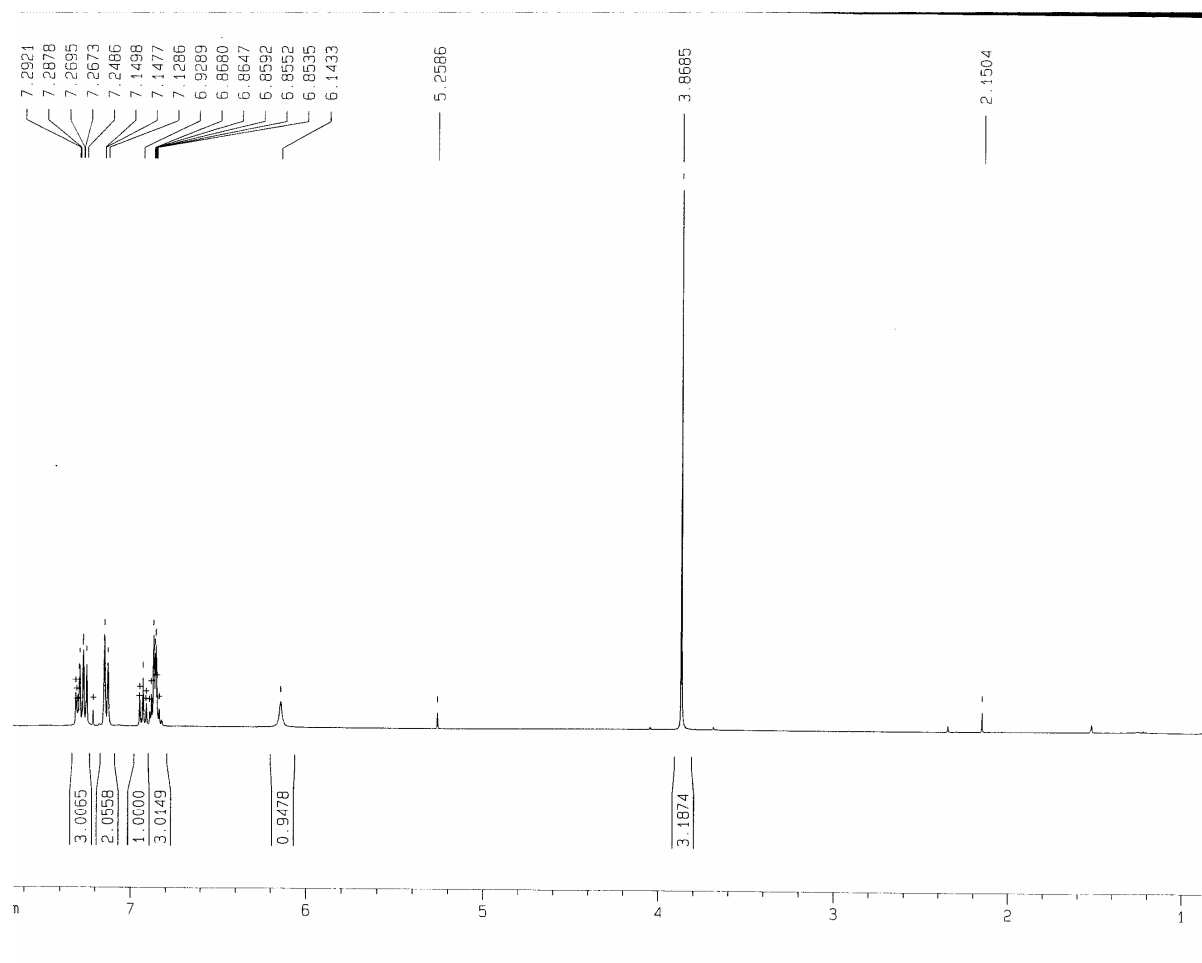

coupled product

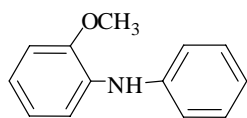

$^{13}\text{C}\{^1\text{H}\}$  NMR

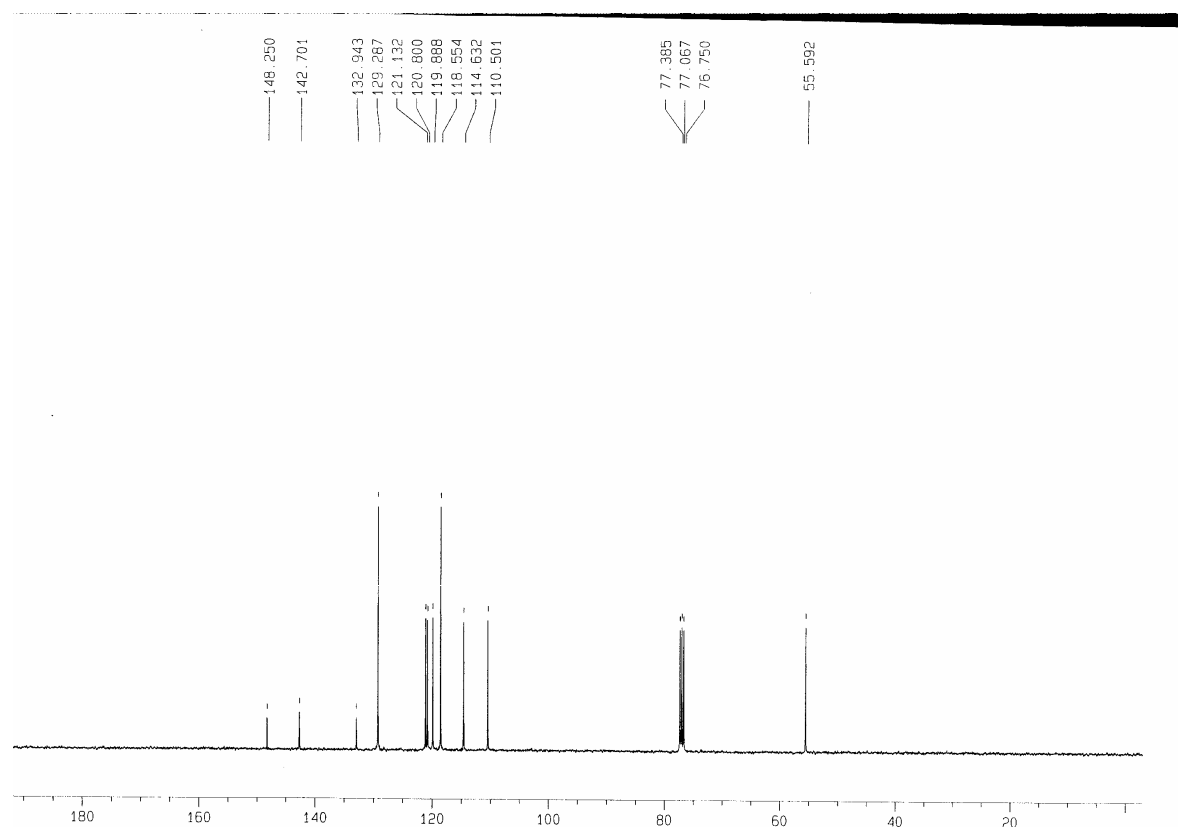

coupled product

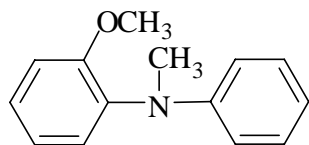

$^1\text{H}$  NMR

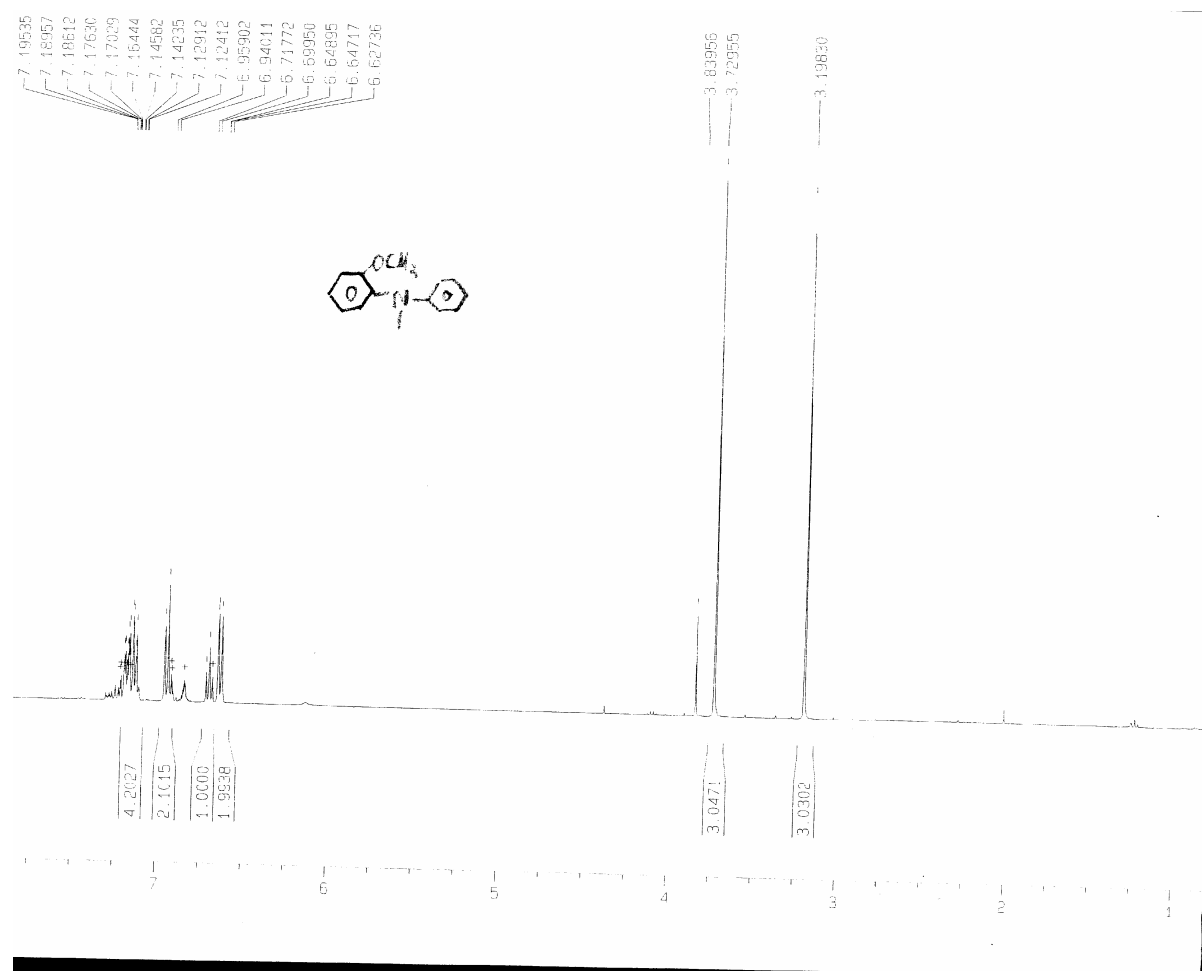

coupled product



$^{13}\text{C}\{^1\text{H}\}$  NMR

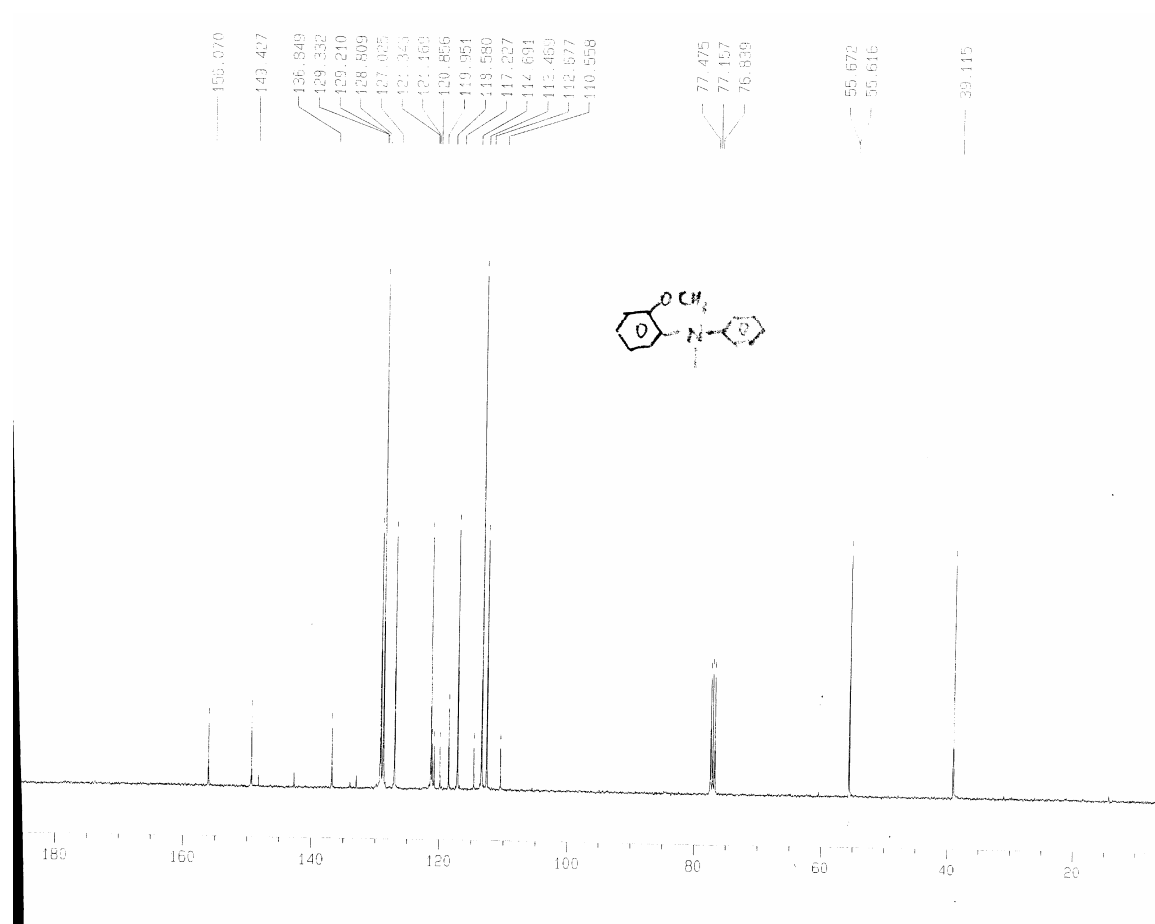

coupled product

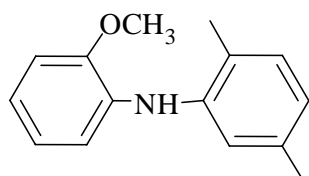

$^1\text{H}$  NMR

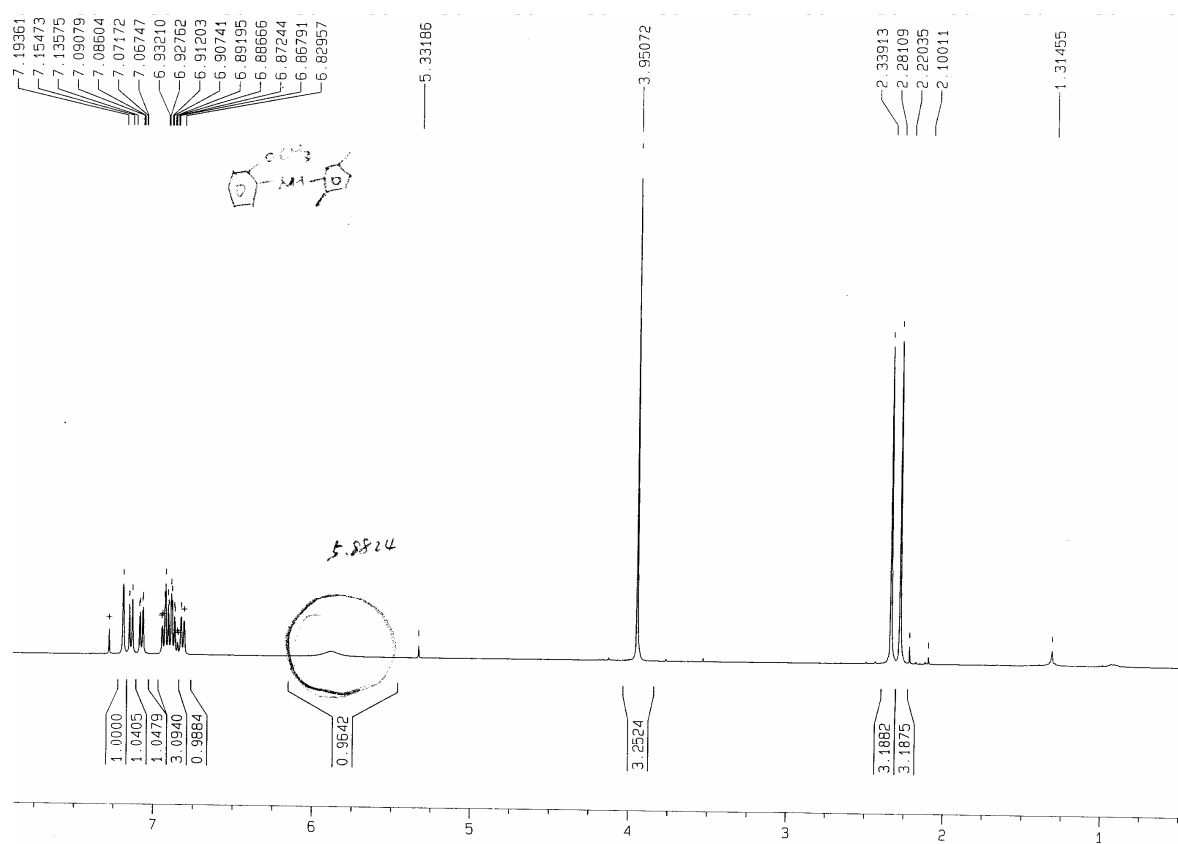

coupled product



$^{13}\text{C}\{^1\text{H}\}$  NMR

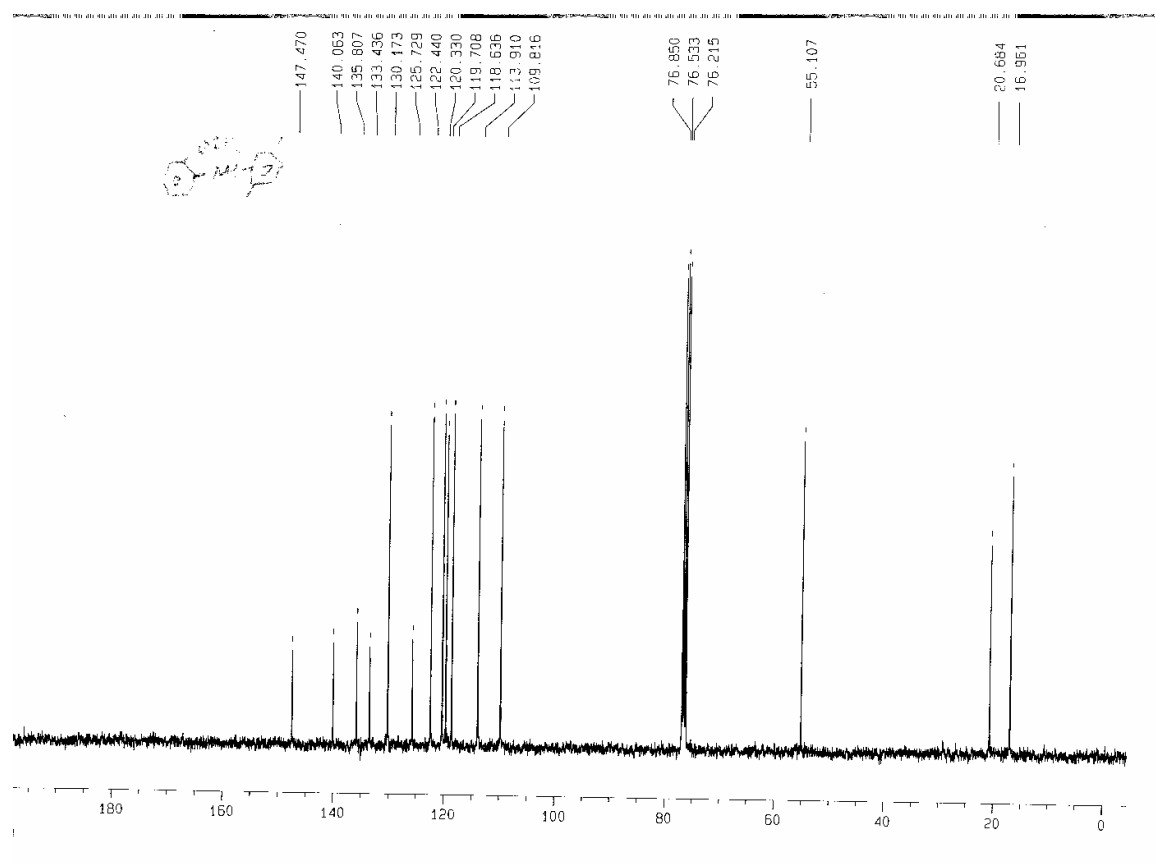

coupled product

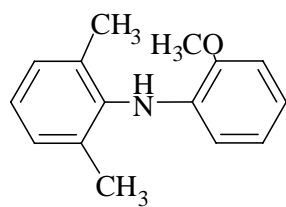

<sup>1</sup>H NMR

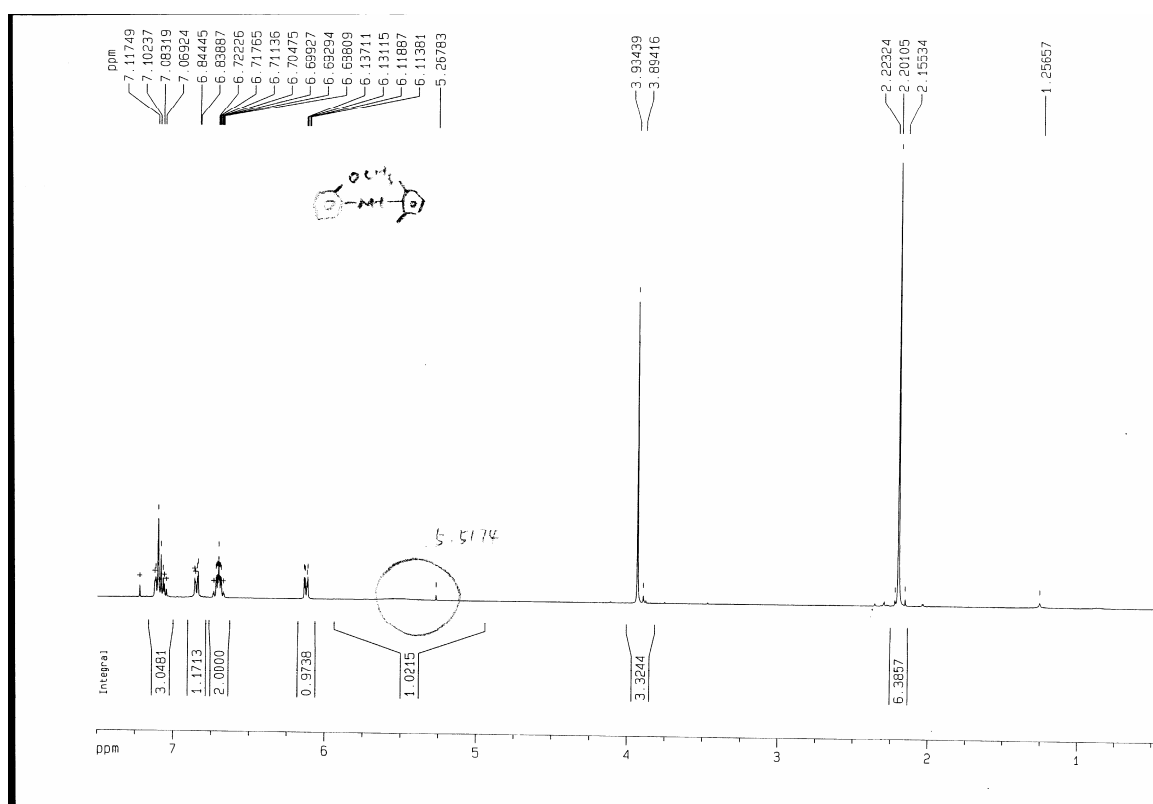



coupled product



$^{13}\text{C}\{^1\text{H}\}$  NMR

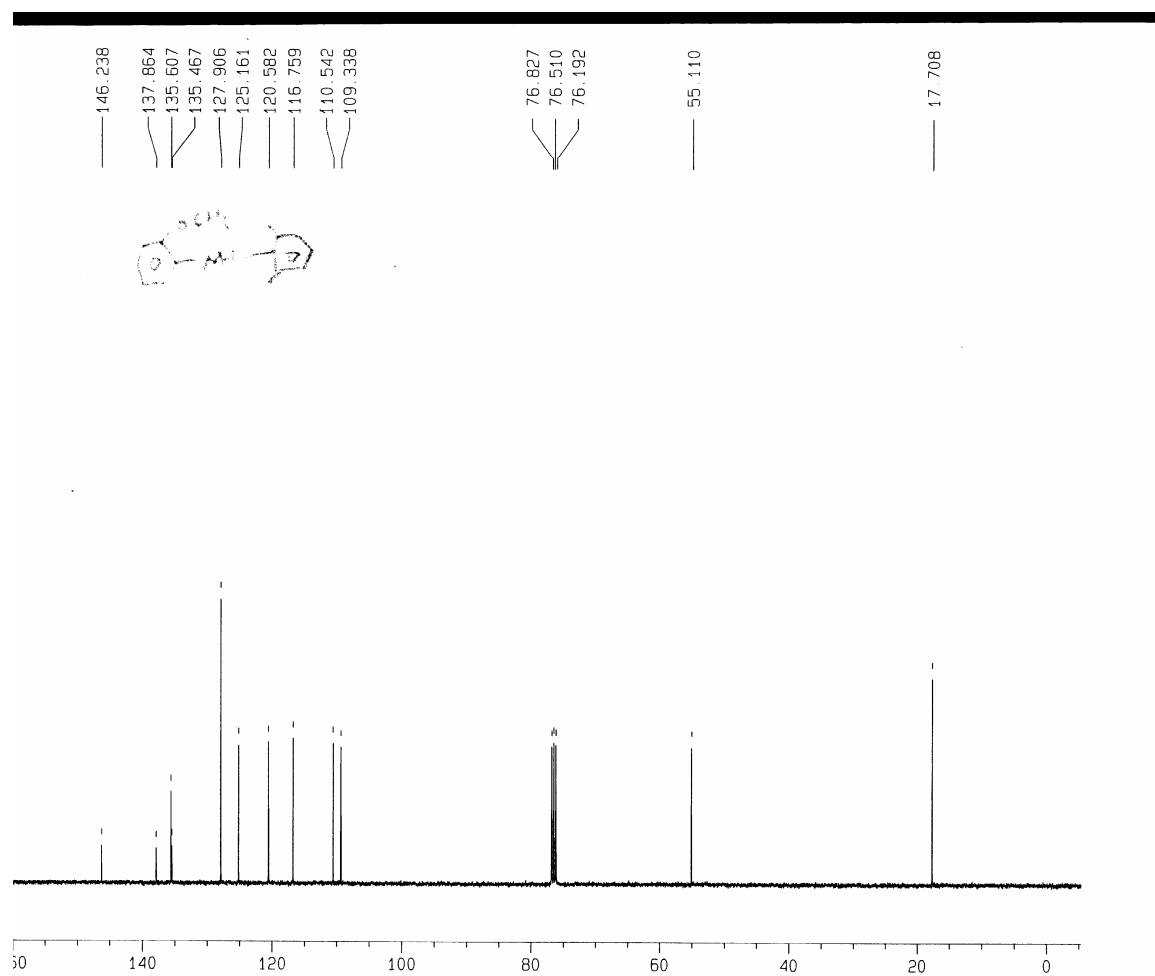

coupled product

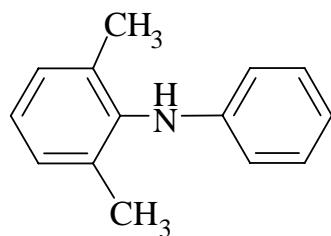

<sup>1</sup>HNMR

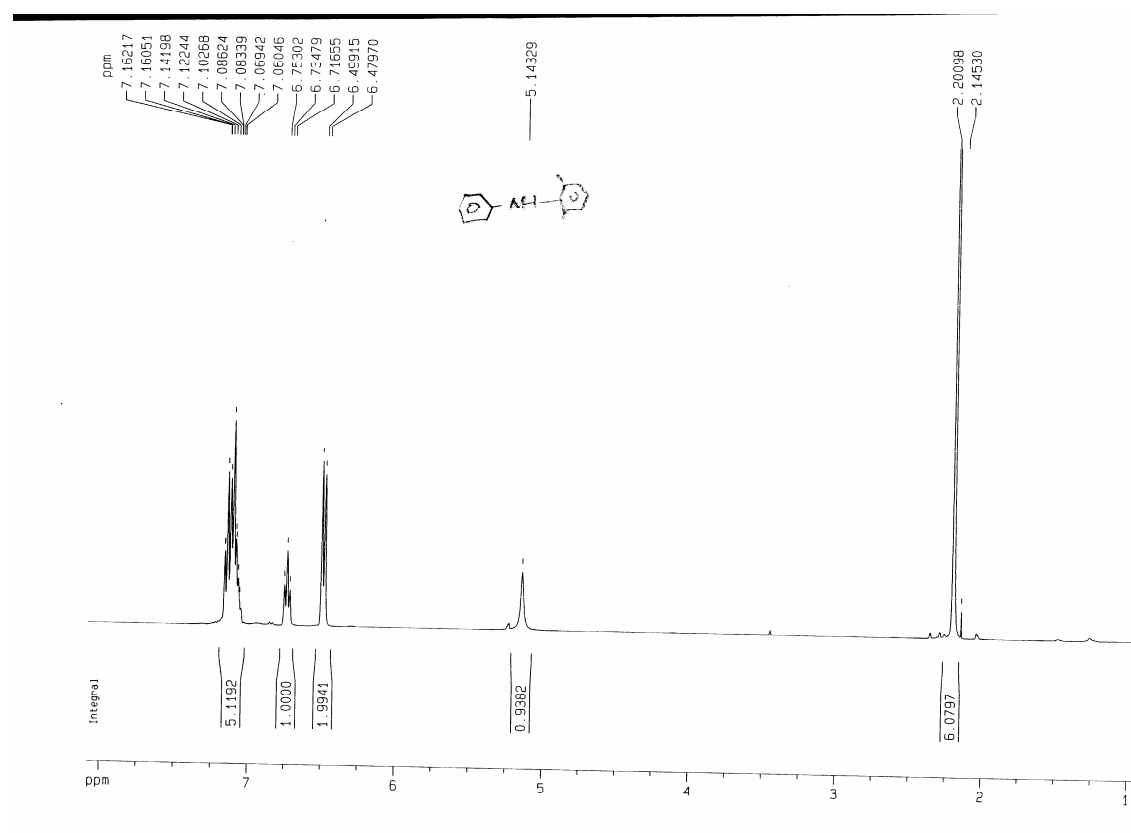

coupled product

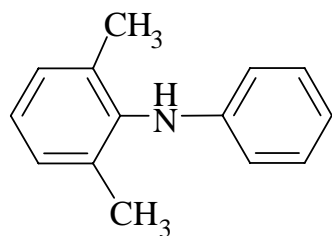

$^{13}\text{C}\{^1\text{H}\}$  NMR

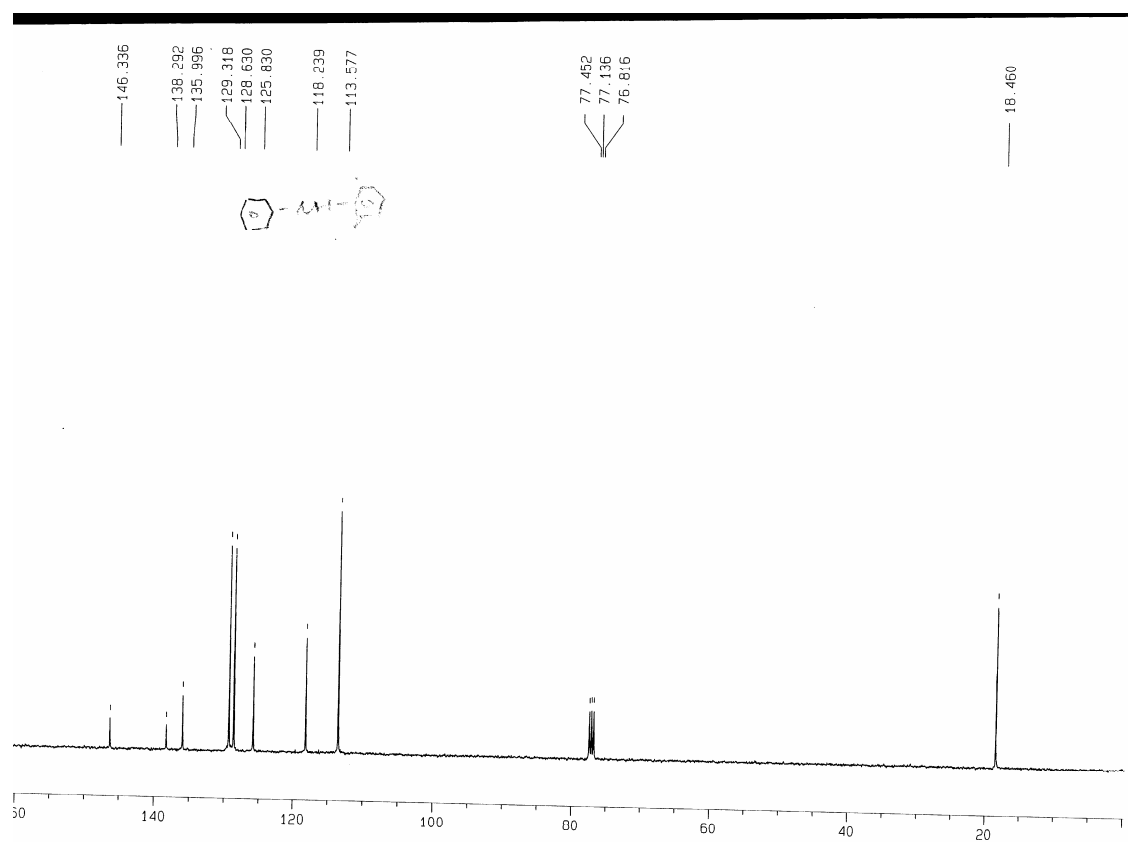

coupled product

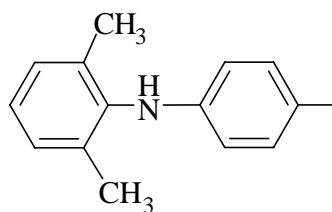

$^1\text{H}$ NMR

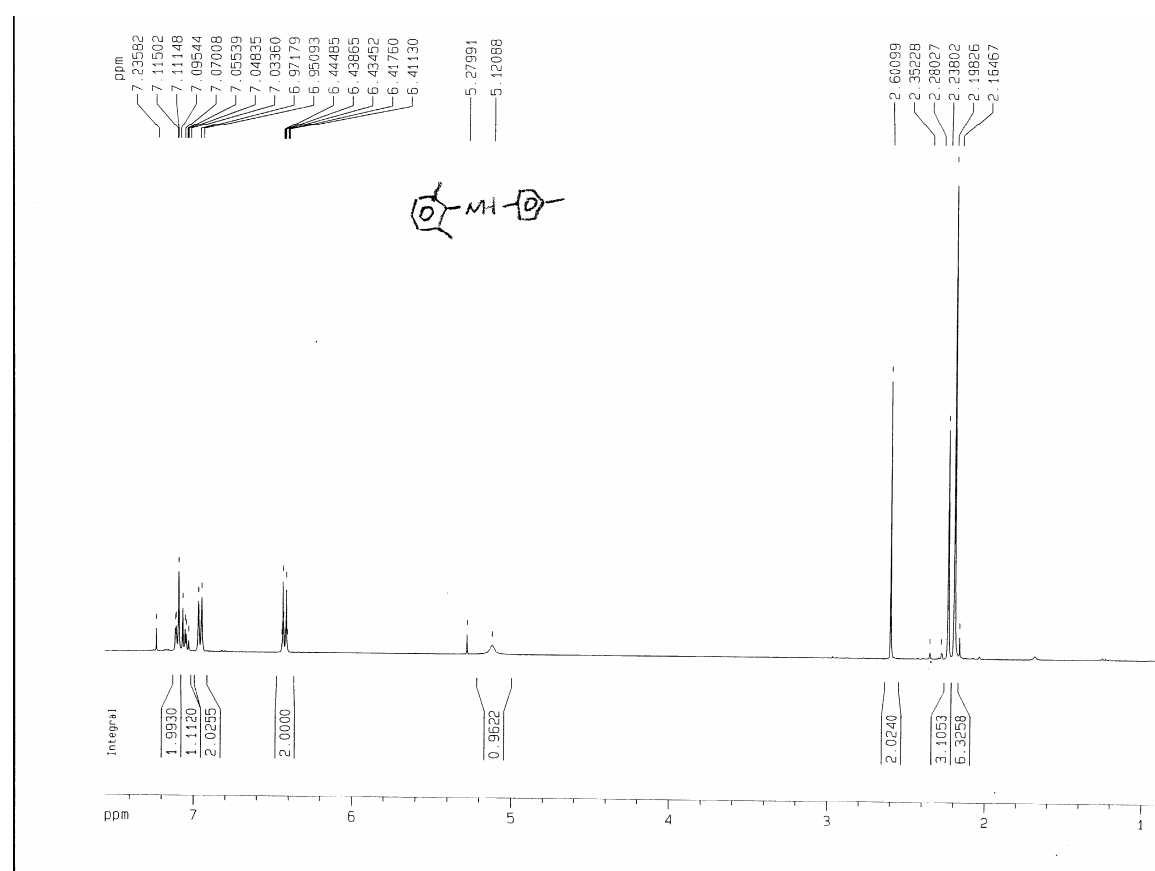

coupled product

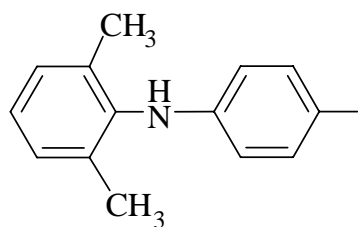

$^{13}\text{C}\{^1\text{H}\}$  NMR

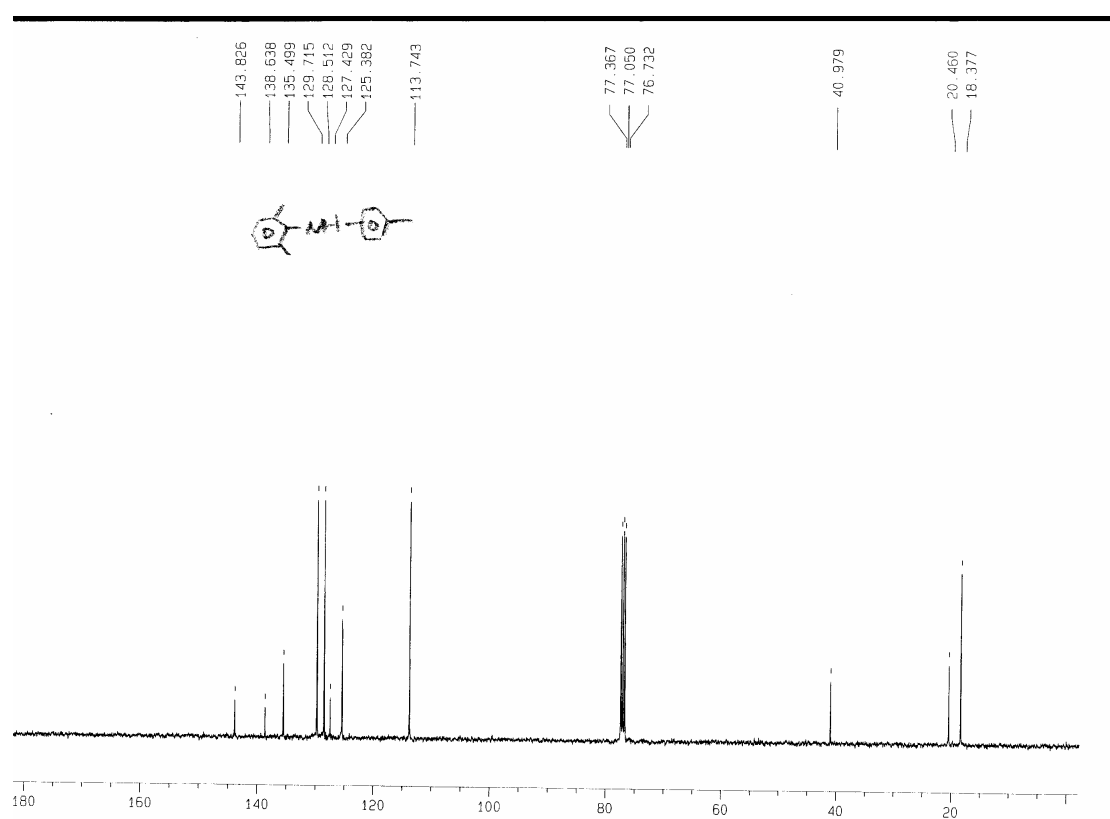

coupled product

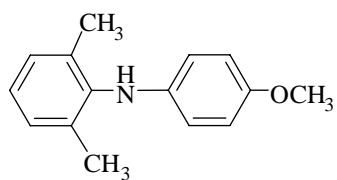

$^1\text{H}$  NMR

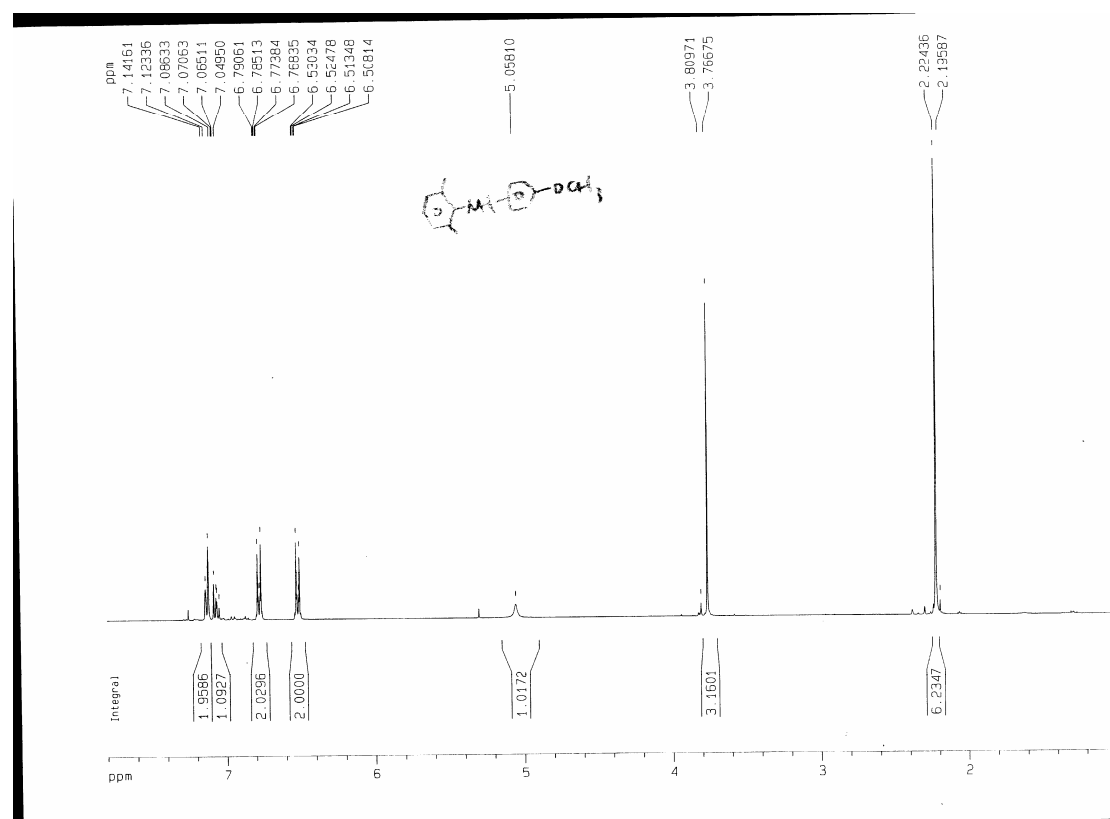

coupled product



$^{13}\text{C}\{^1\text{H}\}$  NMR

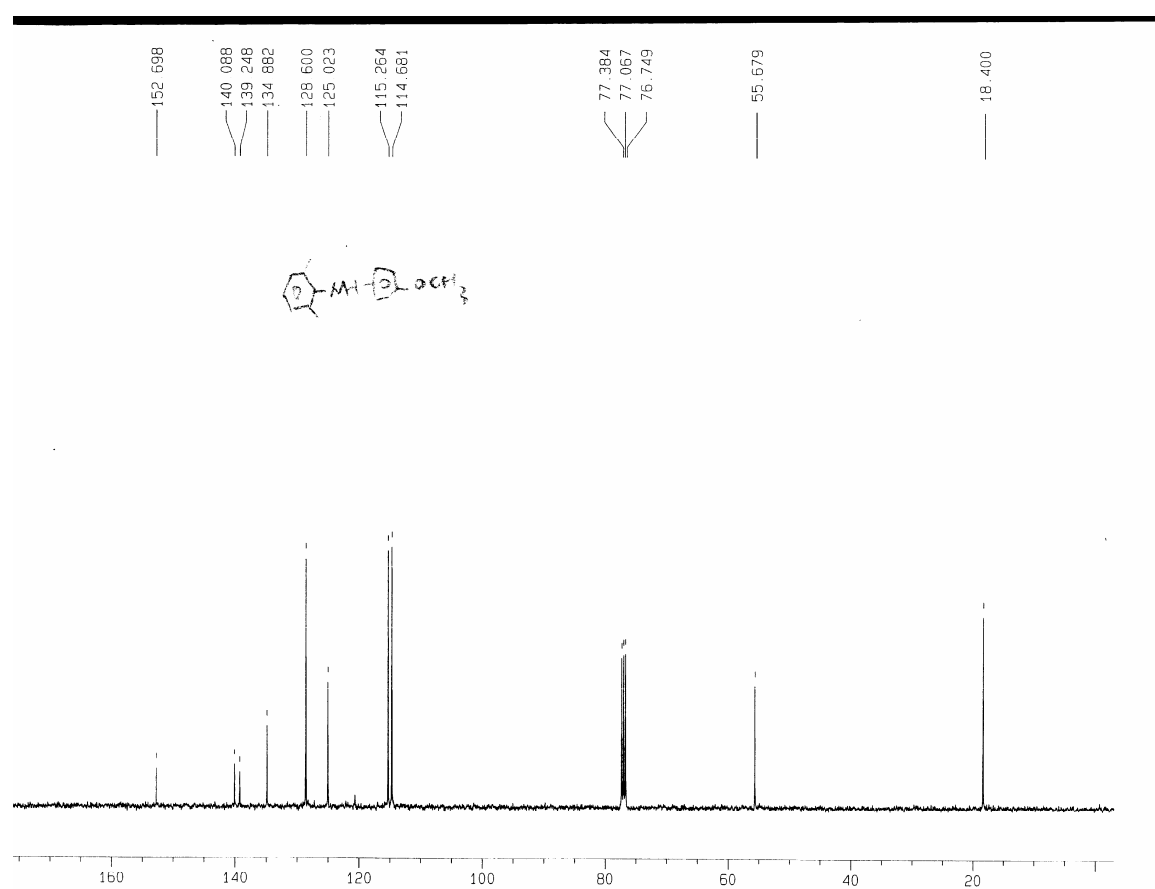

coupled product

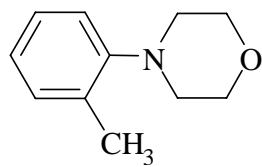

$^1\text{H}$  NMR

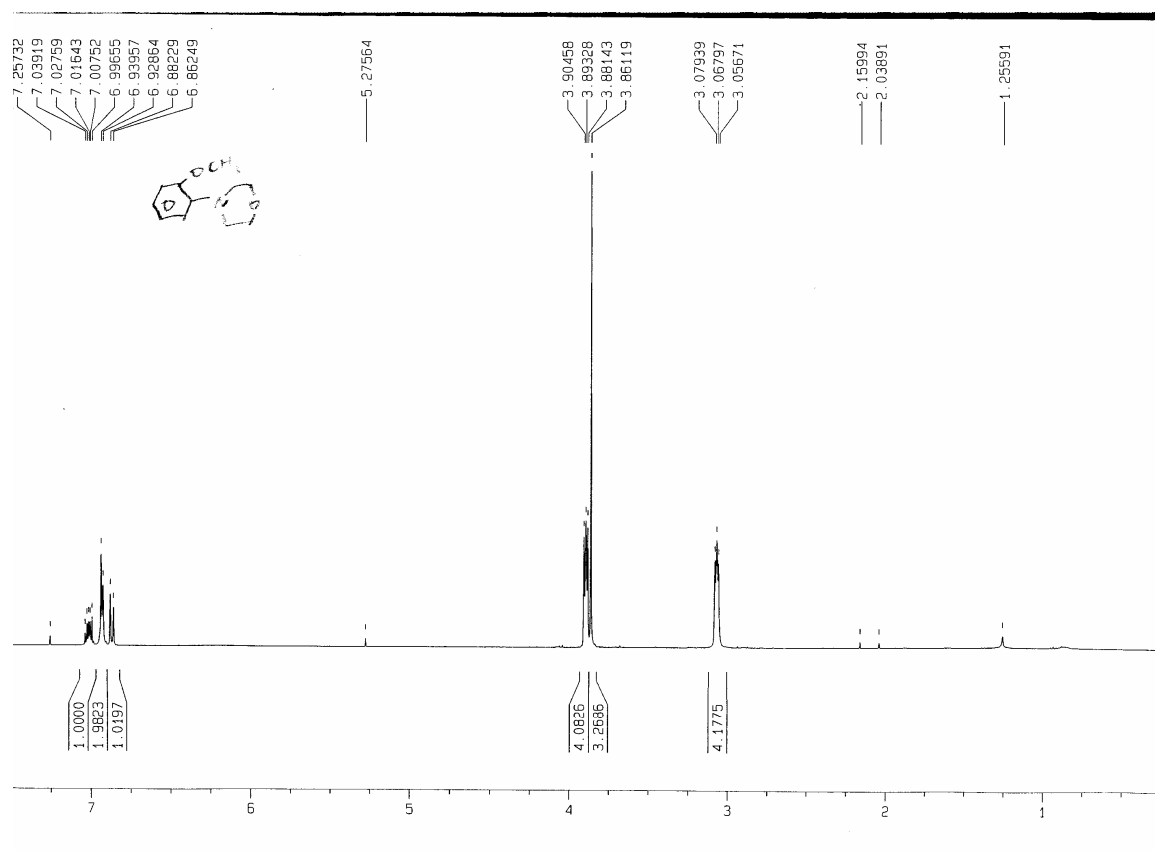



coupled product

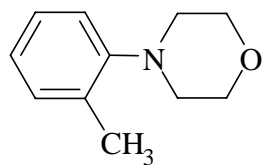

$^{13}\text{C}\{^1\text{H}\}$  NMR

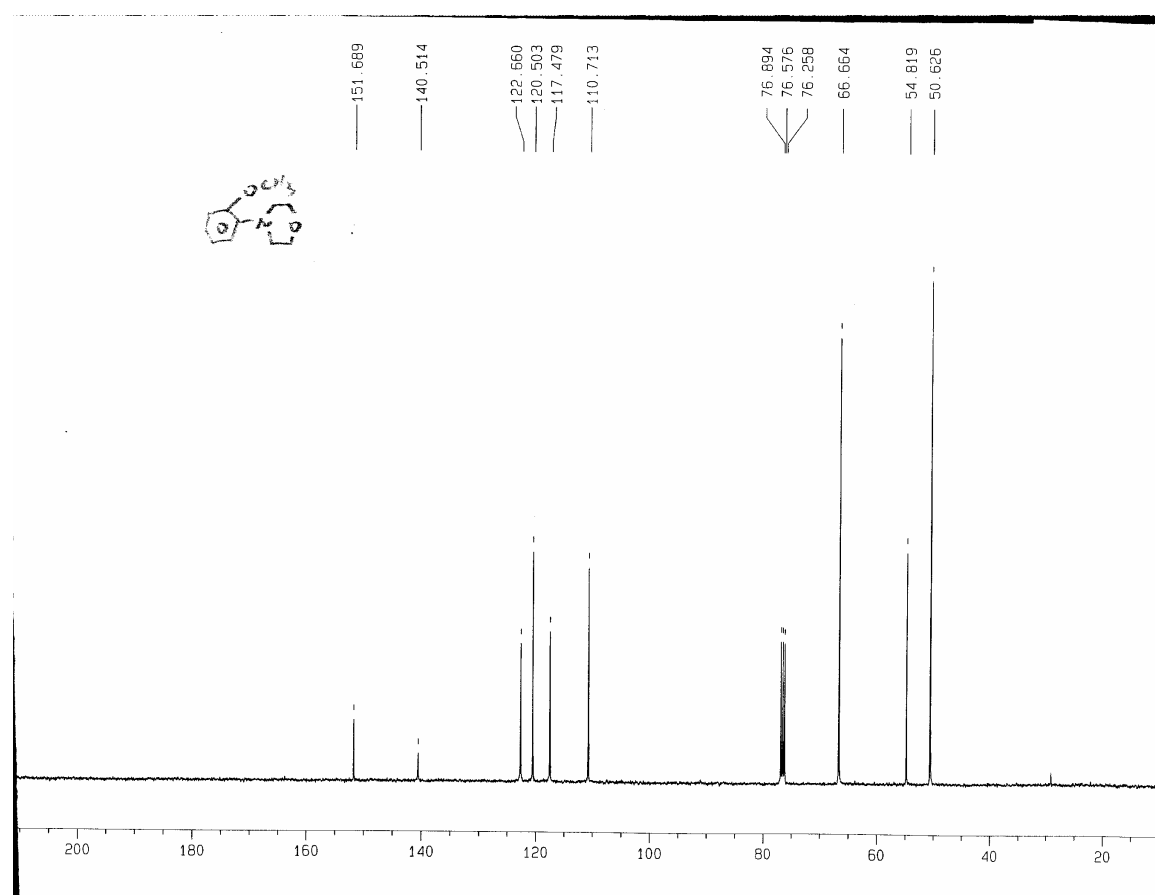

coupled product

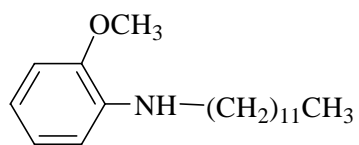

$^1\text{H}$  NMR

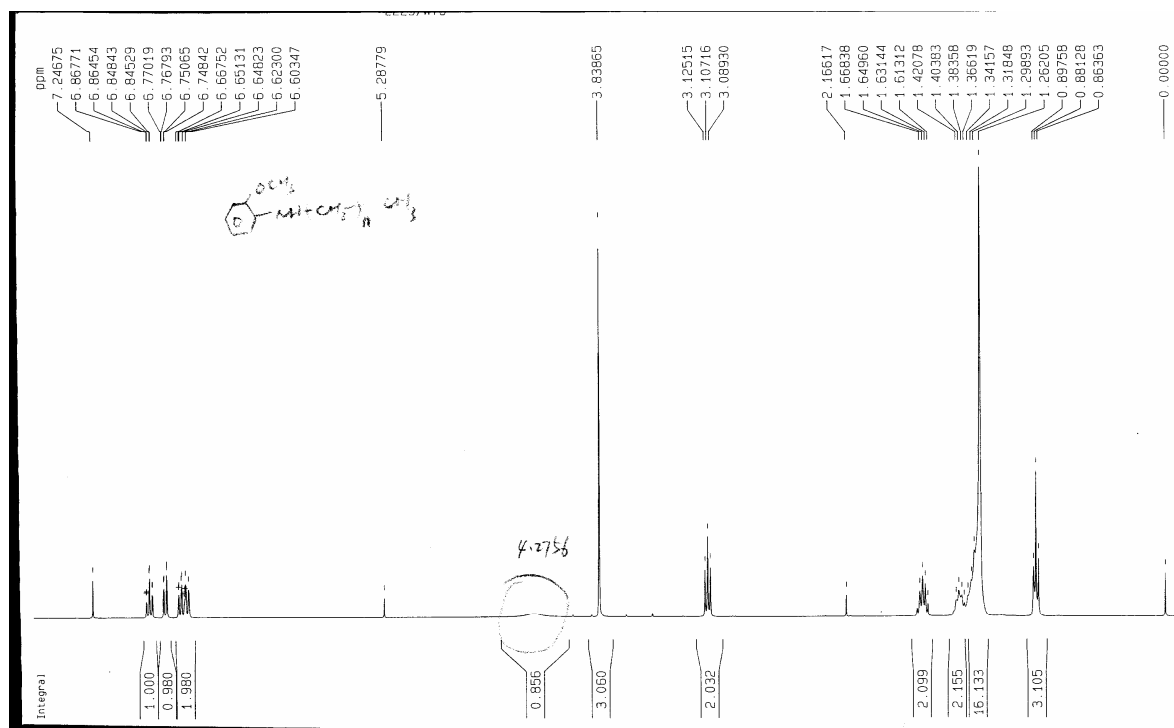

coupled product

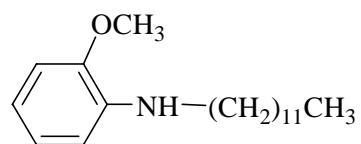

$^{13}\text{C}\{^1\text{H}\}$  NMR

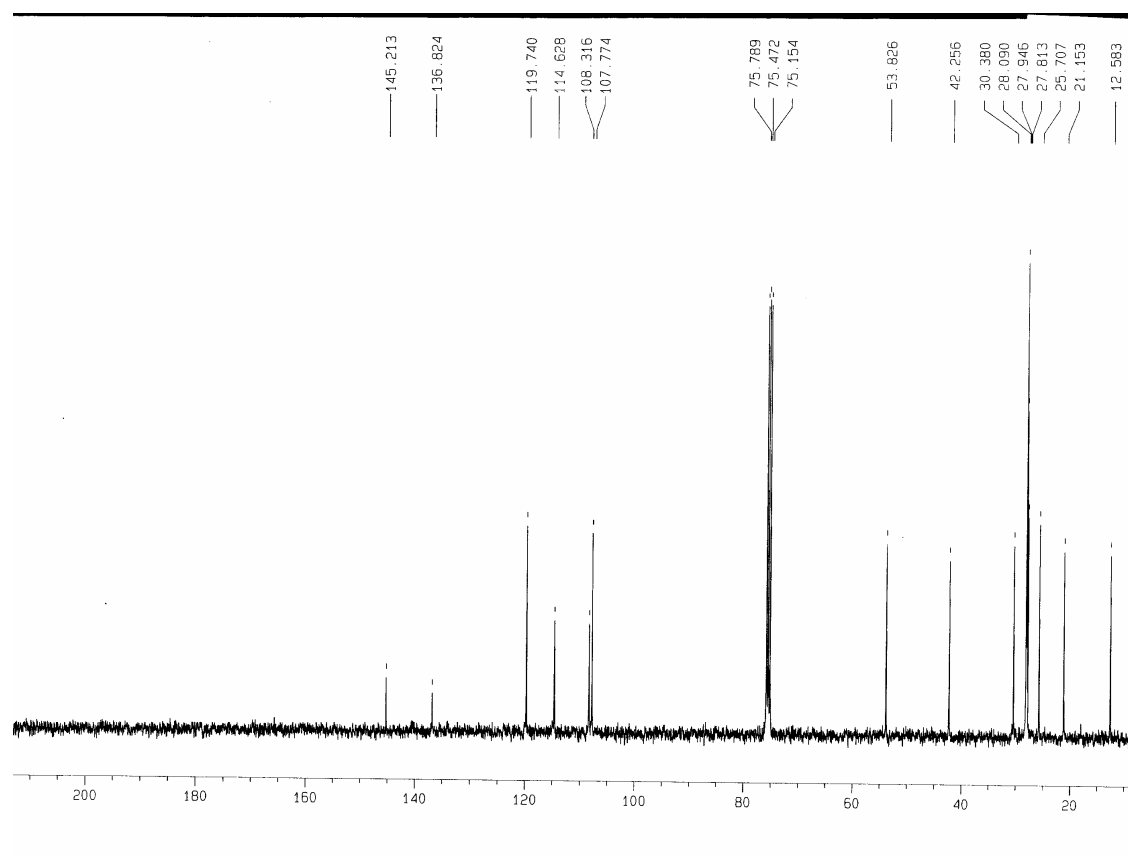

coupled product

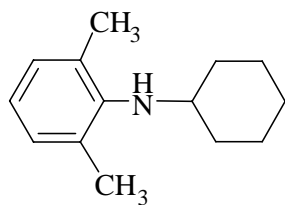

$^1\text{H}$  NMR

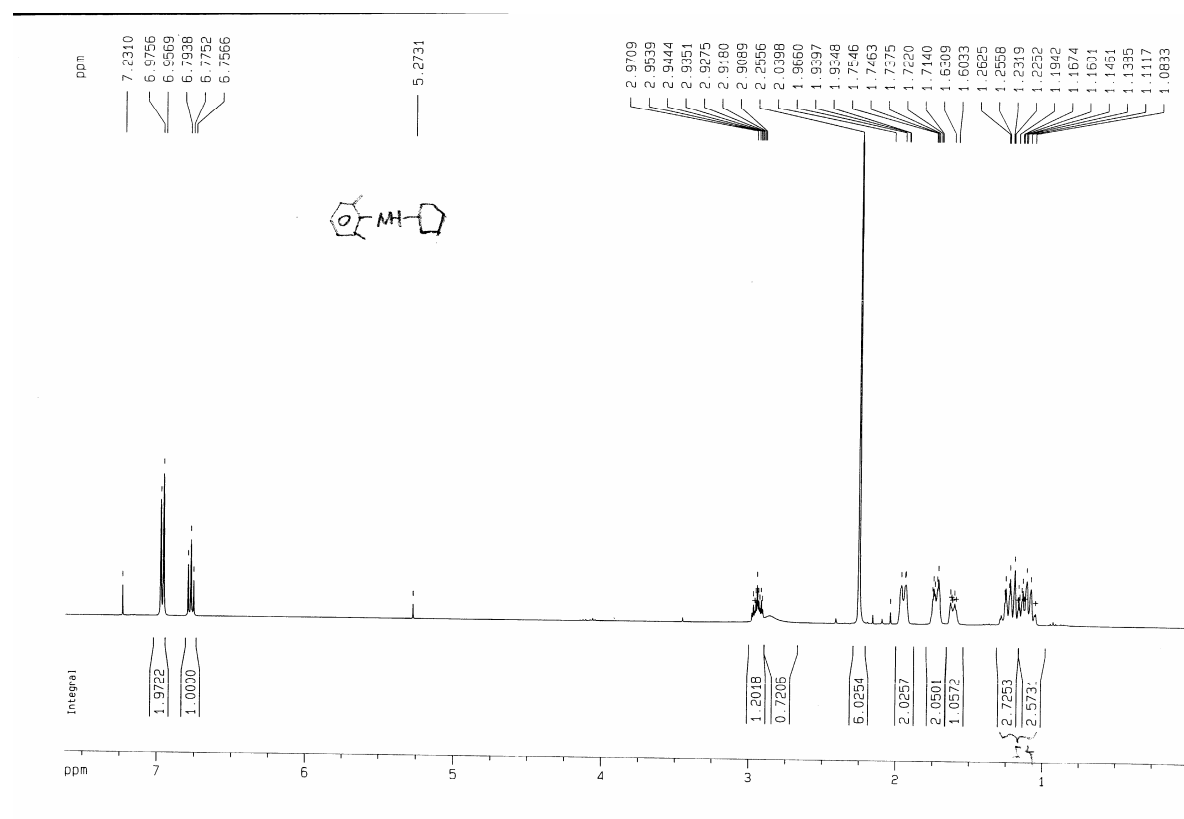

coupled product

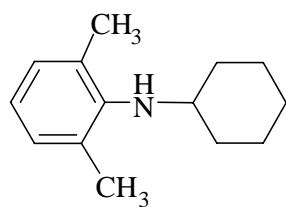

$^{13}\text{C}\{^1\text{H}\}$  NMR

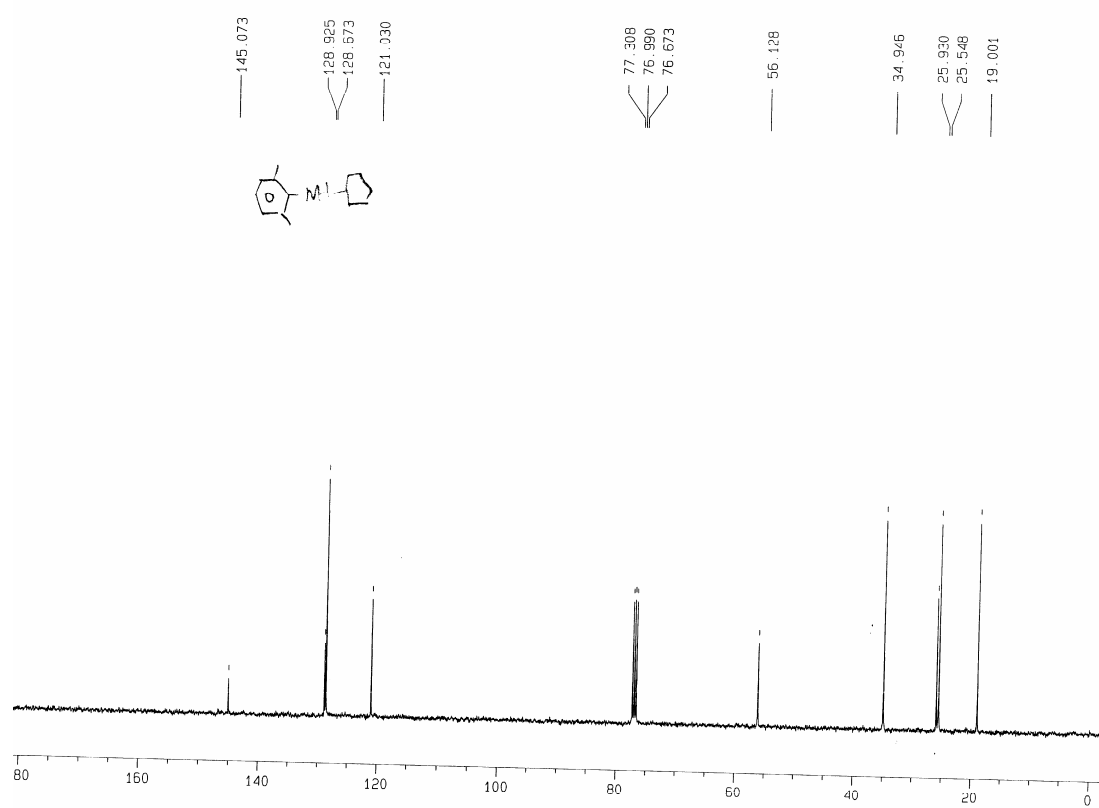

coupled product

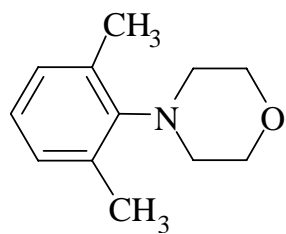

$^1\text{H}$  NMR

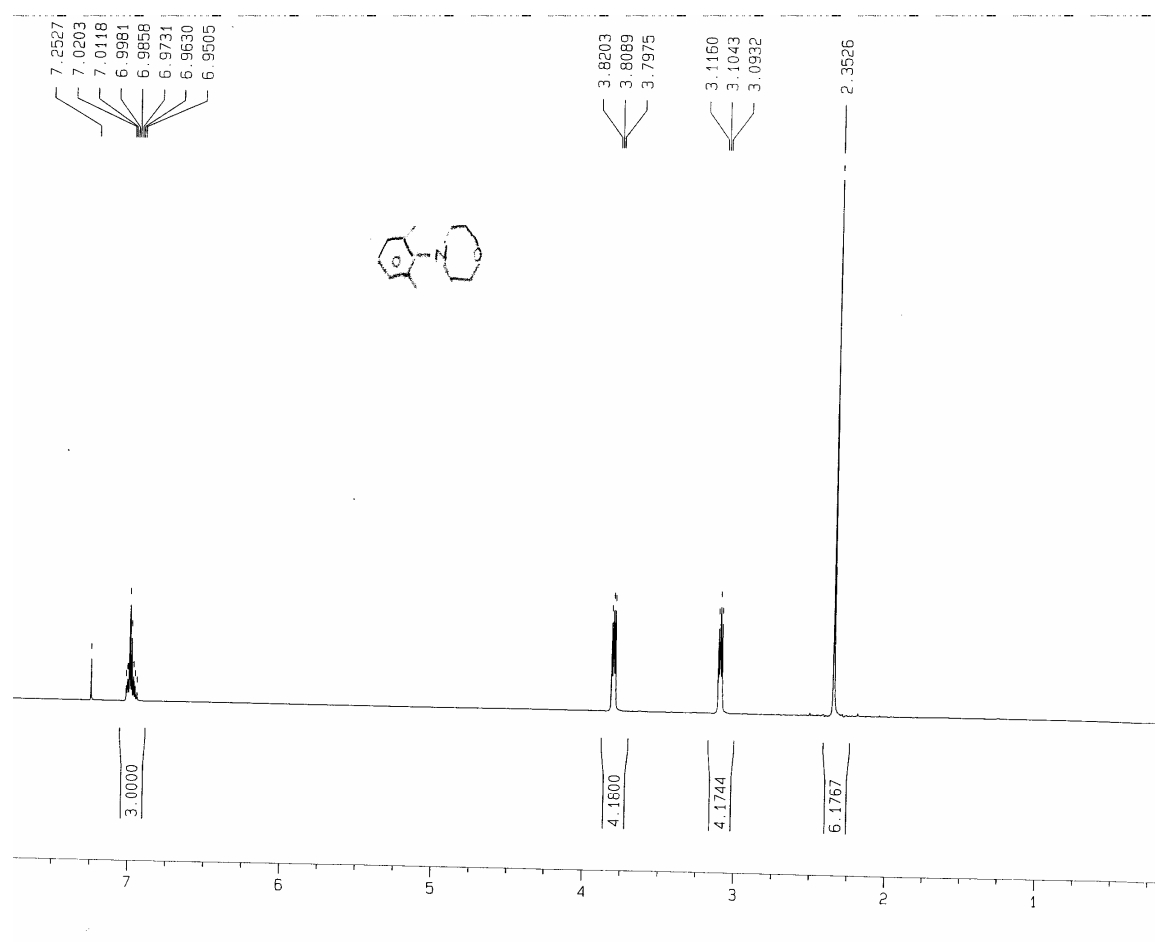

coupled product

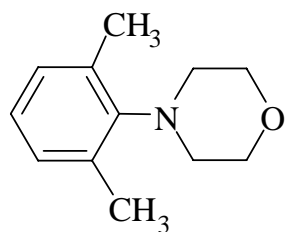

$^{13}\text{C}\{^1\text{H}\}$  NMR

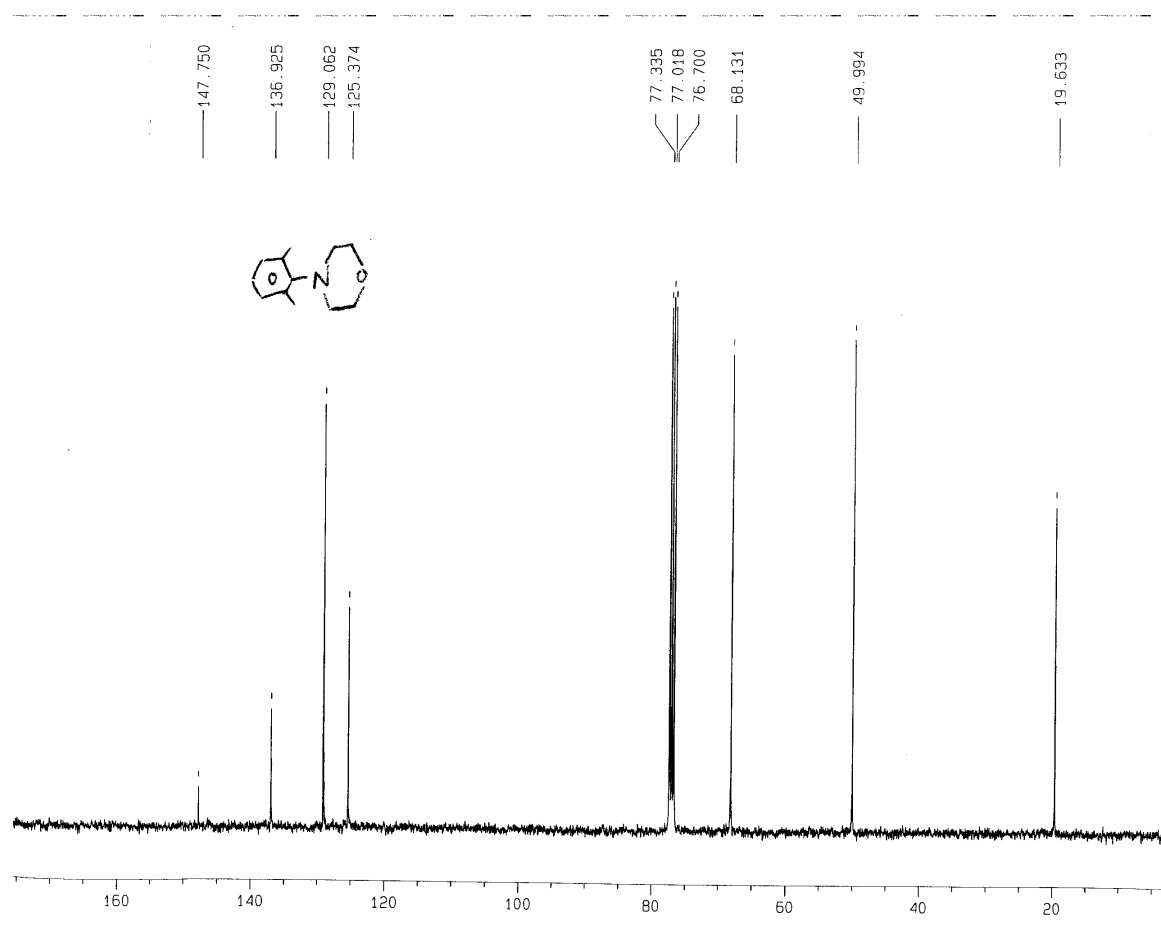

coupled product

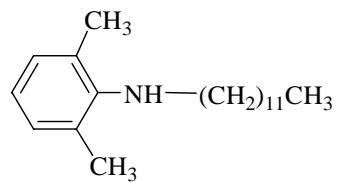

$^1\text{H}$  NMR

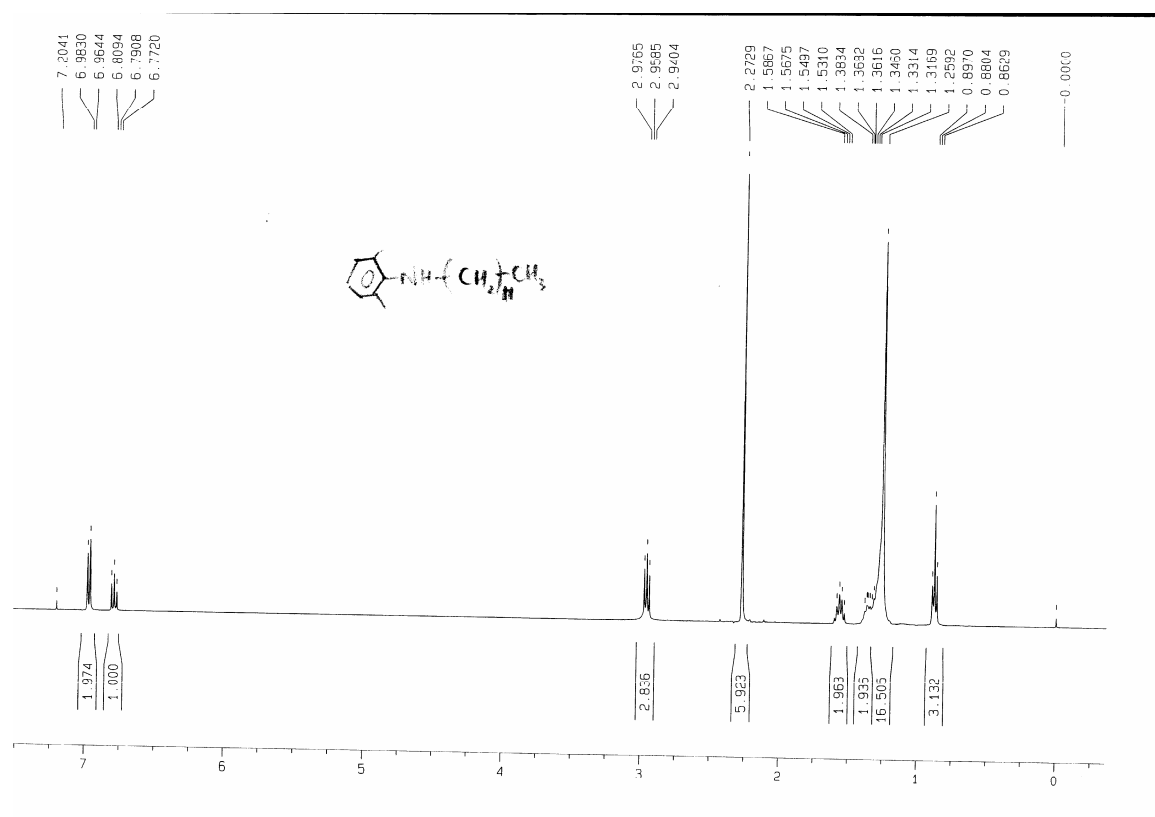



coupled product

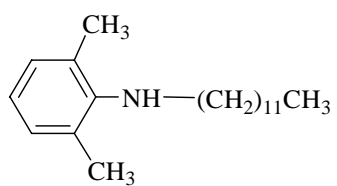

<sup>13</sup>C{<sup>1</sup>H} NMR

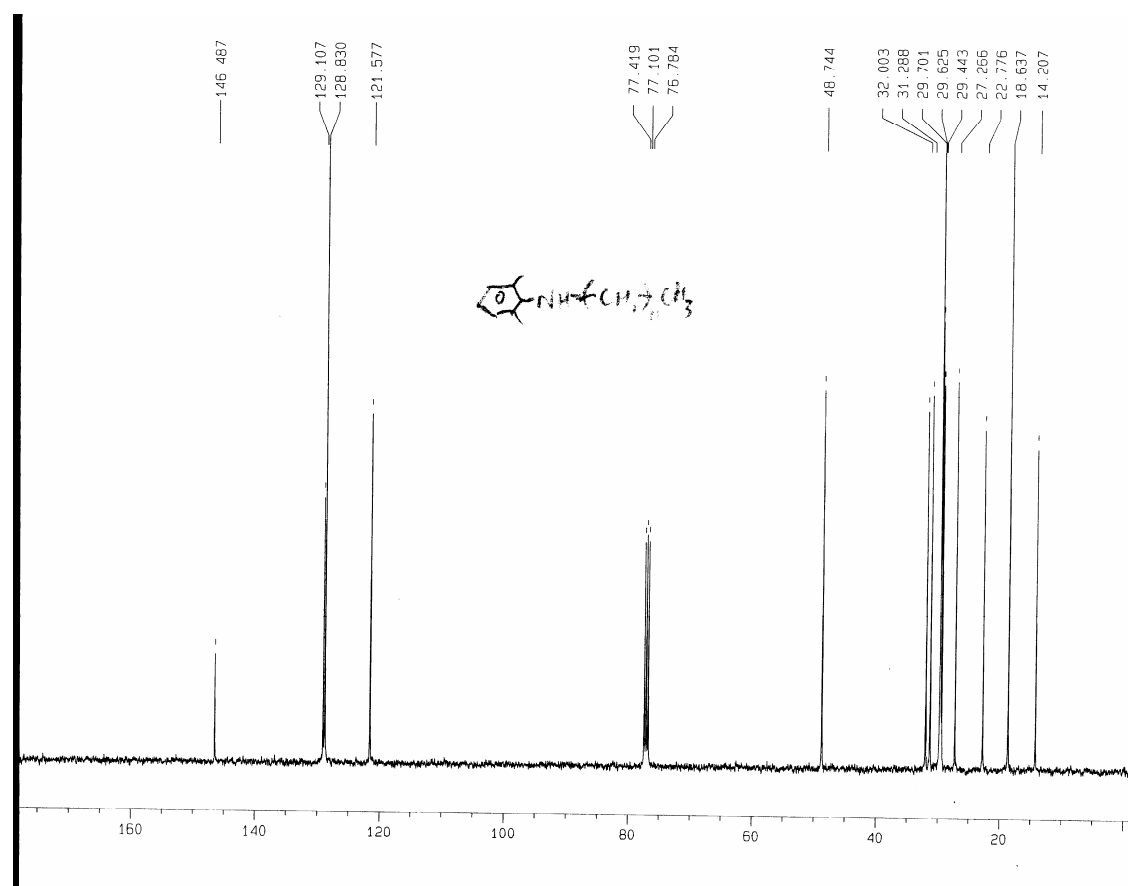

coupled product

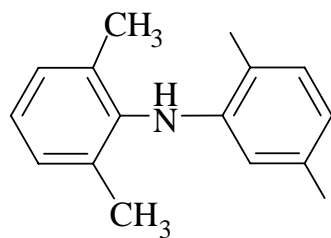

$^1\text{H}$  NMR

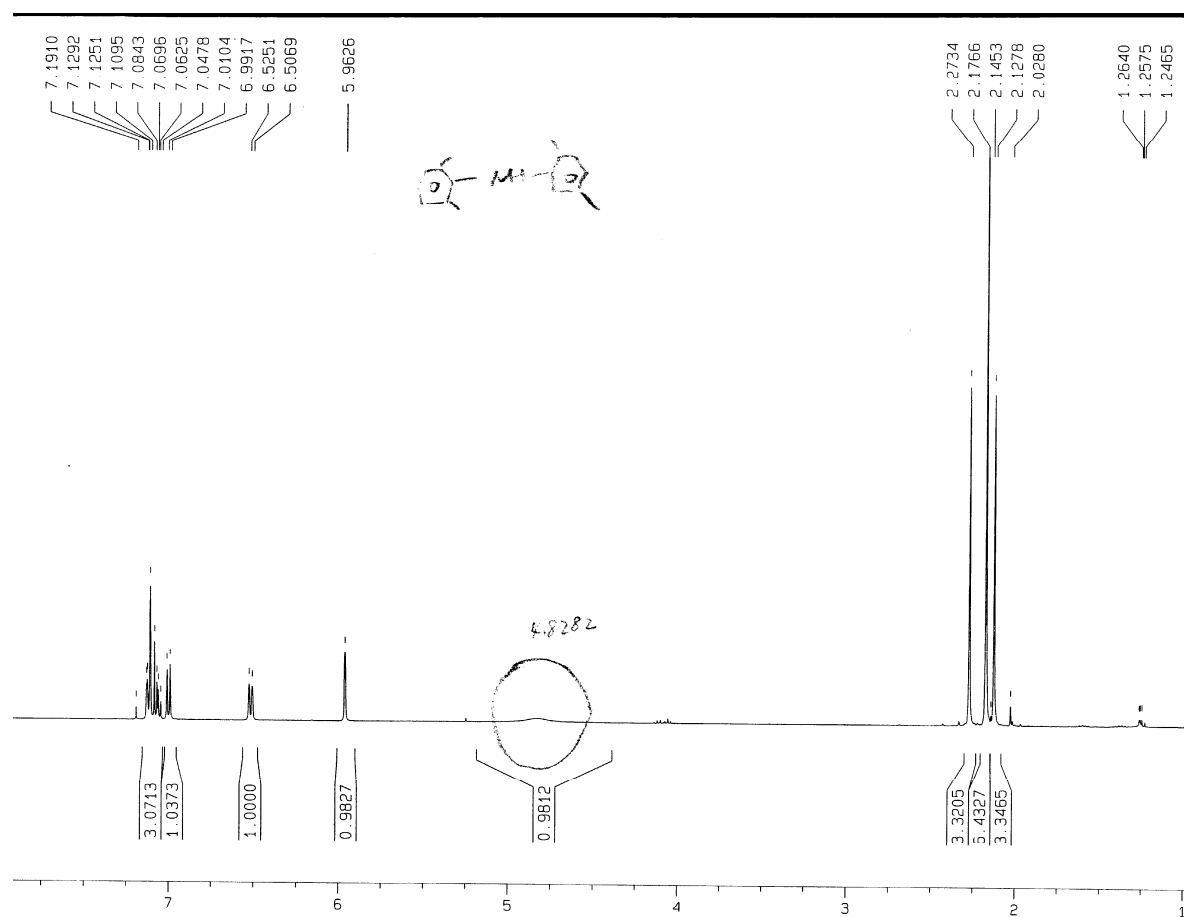

coupled product

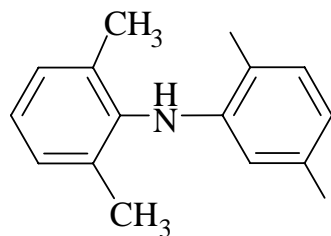

$^{13}\text{C}\{^1\text{H}\}$  NMR

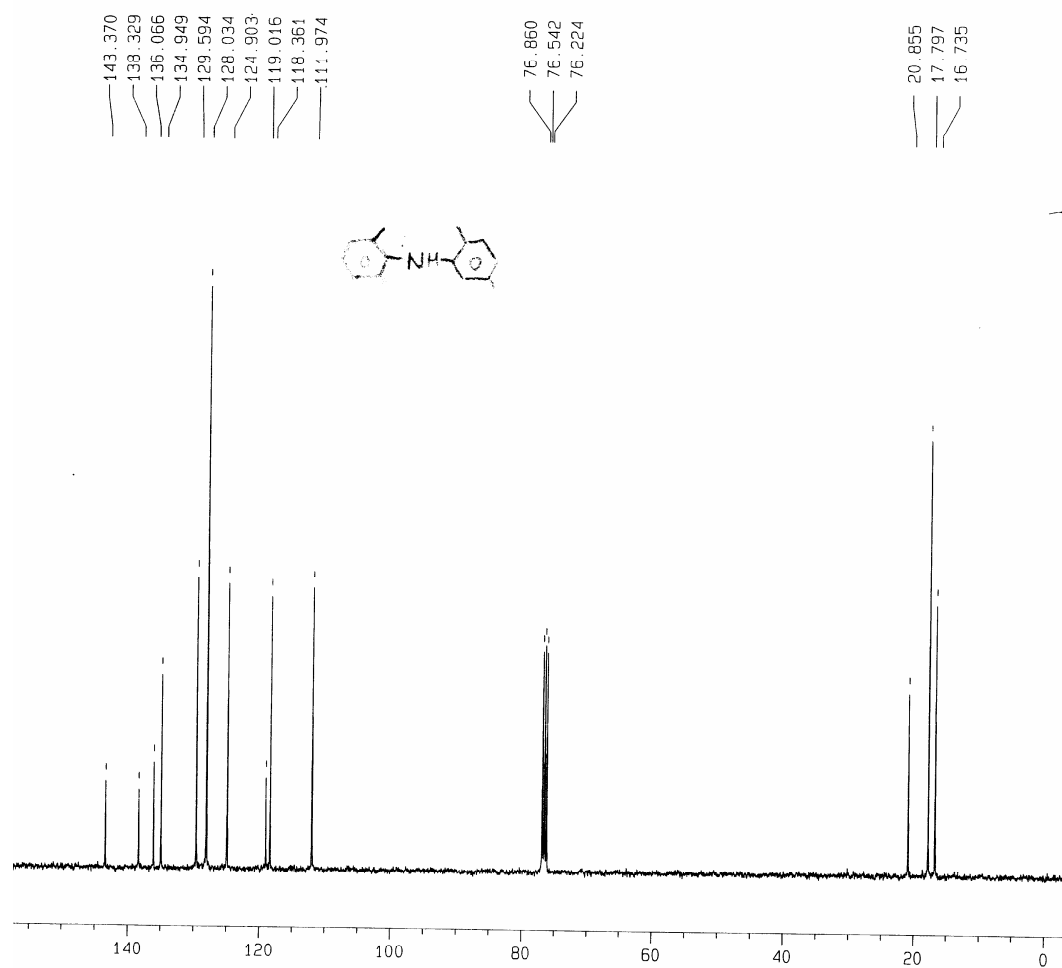

coupled product

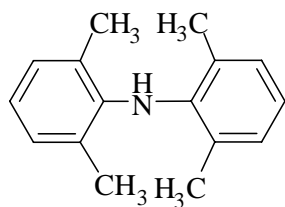

$^1\text{H}$  NMR

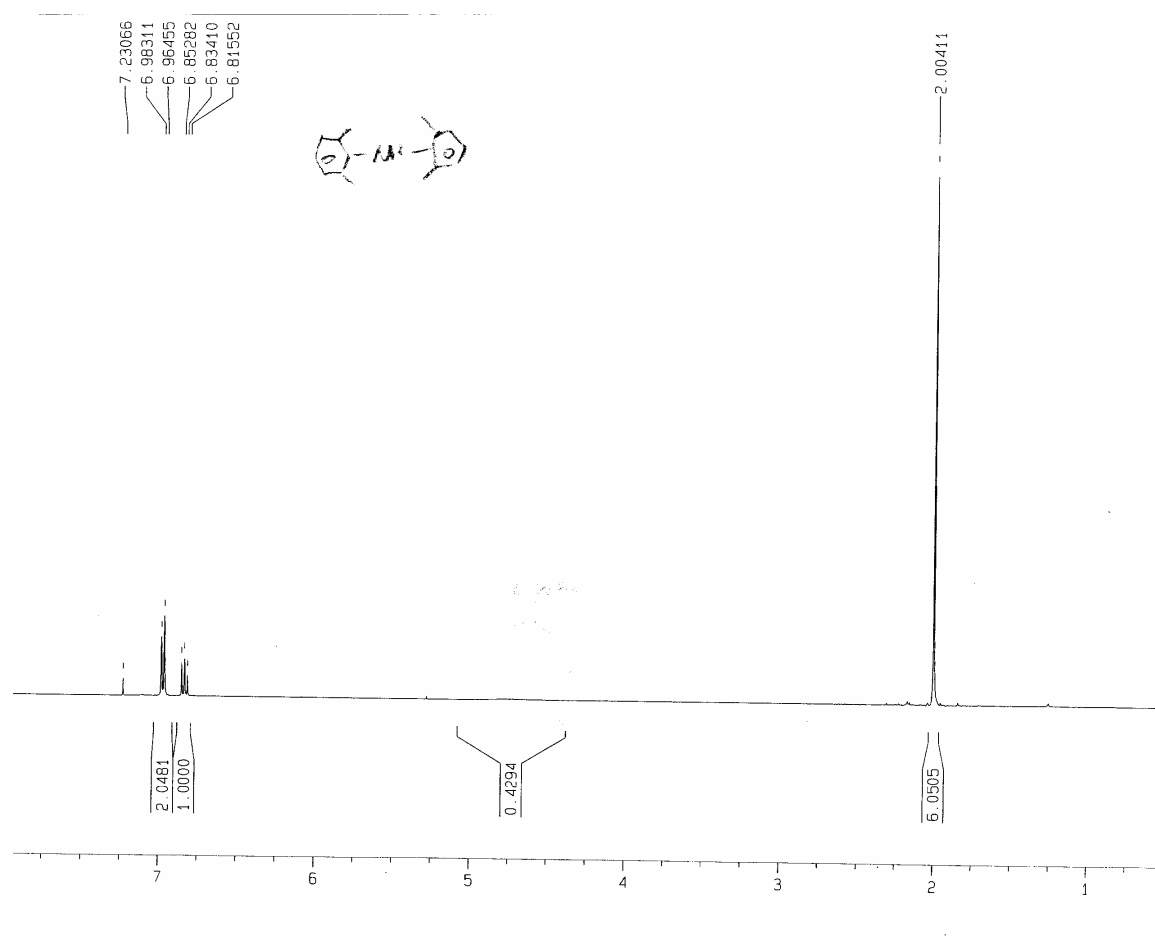

coupled product

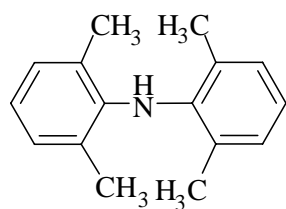

$^{13}\text{C}\{^1\text{H}\}$  NMR

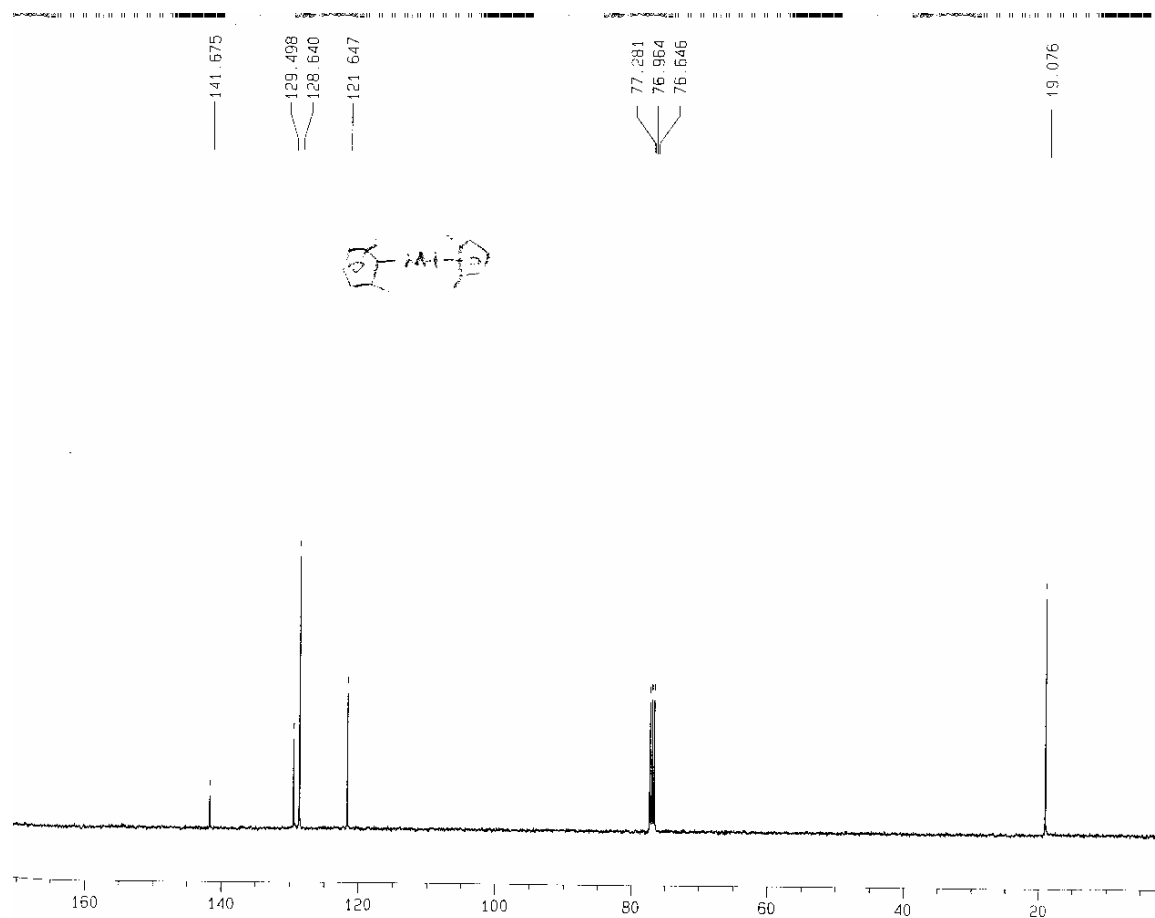

Supplement: Supplementary file 1 [file 4567558]
